# Supplementary material for: Solubility of metal–boron–hydrogen compounds
Source: Royal Society of Chemistry journal article supplement (doi:10.1039/d4dt02256d), 2024-11-25
Supplement: d4dt02256d1.pdf [file d4dt02256d1.pdf]

**Electronic Supplementary Information for:**

**Solubility of metal-boron-hydrogen compounds**

Thi Phuong Thao Nguyen,<sup>a</sup> Terry D. Humphries,<sup>a</sup> Hans Hagemann,<sup>b</sup> Craig E. Buckley,<sup>a</sup> Torben R. Jensen,<sup>c</sup> Mark Paskevicius<sup>a\*</sup>

<sup>a</sup> *Department of Physics and Astronomy, Institute for Energy Transition, Curtin University, GPO Box U1987, Perth, WA 6845, Australia.*

*E-mail: m.paskevicius@curtin.edu.au*

<sup>b</sup> *Département de Chimie Physique, Université de Genève, 30, quai E. Ansermet, CH-1211 Geneva 4, Switzerland..*

<sup>c</sup> *Department of Chemistry, Interdisciplinary Nanoscience Center (iNANO), Aarhus University, Langelandsgade 140, DK-8000 Aarhus, Denmark.*

**Borohydride compounds**

| Solvent                    | Compound                                                                                                                     |                                                             |                                                          |                          |                         |                                     |                                   |                                   |                                   |                          |                                                    |                                                              |                                  |                                   |                                   |                                   |                                   |                                   |                                   |                                   |                                  |                    |
|----------------------------|------------------------------------------------------------------------------------------------------------------------------|-------------------------------------------------------------|----------------------------------------------------------|--------------------------|-------------------------|-------------------------------------|-----------------------------------|-----------------------------------|-----------------------------------|--------------------------|----------------------------------------------------|--------------------------------------------------------------|----------------------------------|-----------------------------------|-----------------------------------|-----------------------------------|-----------------------------------|-----------------------------------|-----------------------------------|-----------------------------------|----------------------------------|--------------------|
|                            | LiBH <sub>4</sub>                                                                                                            | NaBH <sub>4</sub>                                           | KBH <sub>4</sub>                                         | CsBH <sub>4</sub>        | RbBH <sub>4</sub>       | Mg(BH <sub>4</sub> ) <sub>2</sub>   | Ca(BH <sub>4</sub> ) <sub>2</sub> | Sr(BH <sub>4</sub> ) <sub>2</sub> | Ba(BH <sub>4</sub> ) <sub>2</sub> | TMABH <sub>4</sub>       | TBABH <sub>4</sub>                                 | TEABH <sub>4</sub>                                           | Y(BH <sub>4</sub> ) <sub>3</sub> | Nd(BH <sub>4</sub> ) <sub>3</sub> | Sm(BH <sub>4</sub> ) <sub>2</sub> | Sm(BH <sub>4</sub> ) <sub>3</sub> | Gd(BH <sub>4</sub> ) <sub>3</sub> | Yb(BH <sub>4</sub> ) <sub>2</sub> | Yb(BH <sub>4</sub> ) <sub>3</sub> | Eu(BH <sub>4</sub> ) <sub>2</sub> | U(BH <sub>4</sub> ) <sub>4</sub> |                    |
| Water                      | sol. <sup>a 1</sup><br>reac.*                                                                                                | 55 wt.% <sup>b 4</sup>                                      | 19 wt.% <sup>b 4</sup><br>reac.*                         | vs. <sup>b 8</sup>       | vs. <sup>b 8</sup>      | reac.                               | sol. <sup>b 8</sup>               | sol. <sup>b 8</sup>               |                                   | 48 wt.% <sup>13</sup>    | sol. <sup>5</sup>                                  | reac. <sup>13,14</sup>                                       |                                  |                                   |                                   |                                   |                                   |                                   |                                   |                                   |                                  |                    |
| Methanol                   | reac.                                                                                                                        | reac. (16.4 wt.%) <sup>4</sup>                              | 0.7 wt.% (20°C) <sup>4</sup><br>0.56 wt.% <sup>b 8</sup> | 14.2 wt.% <sup>b 8</sup> | 6.1 wt.% <sup>b 8</sup> | reac.                               |                                   |                                   |                                   | reac. <sup>13</sup>      |                                                    | reac. <sup>13,14</sup>                                       |                                  |                                   |                                   |                                   |                                   |                                   |                                   |                                   |                                  |                    |
| Ethanol                    | sol. <sup>1</sup>                                                                                                            | reac. (4.0 wt.%) <sup>4</sup>                               | 0.25 wt.% <sup>b 8</sup>                                 |                          |                         | reac.                               |                                   |                                   |                                   | 0.5 wt.% <sup>b 13</sup> | sol. <sup>14</sup>                                 | reac. <sup>13</sup>                                          |                                  |                                   |                                   |                                   |                                   |                                   |                                   |                                   |                                  |                    |
| THF                        | 11.43 M <sup>b 2</sup><br>21 - 28 wt.% <sup>3</sup><br>15.5 g/100 g (-23°C) <sup>4</sup><br>24.3 g/100 g (35°C) <sup>4</sup> | 0.1 wt.% <sup>4</sup>                                       | insol. <sup>b 8</sup>                                    |                          |                         | sol. <sup>6</sup>                   | 1690 mmol/L <sup>6</sup>          | 40 mmol/L <sup>6</sup>            | insol. <sup>6</sup>               | insol. <sup>4,13</sup>   | sol. <sup>5</sup>                                  | insol. <sup>14</sup>                                         | 40 mmol/L <sup>6</sup>           | 35 mmol/L <sup>6</sup>            | 40 mmol/L <sup>6</sup>            | < 25 mmol/L <sup>6</sup>          | 40 mmol/L <sup>6</sup>            | 25 mmol/L <sup>6</sup>            | 60 mmol/L <sup>6</sup>            |                                   |                                  |                    |
| Ammonia                    | 48 wt.% (RT) <sup>4</sup>                                                                                                    | 104 wt.% <sup>b 4</sup>                                     | 20 wt.% <sup>b 4</sup>                                   |                          |                         |                                     |                                   |                                   |                                   |                          |                                                    | sol. <sup>14</sup>                                           |                                  |                                   |                                   |                                   |                                   |                                   |                                   |                                   |                                  |                    |
| Methylamine                |                                                                                                                              | 27.6 wt.% (-22°C) <sup>9</sup>                              |                                                          |                          |                         |                                     |                                   |                                   |                                   |                          |                                                    |                                                              |                                  |                                   |                                   |                                   |                                   |                                   |                                   |                                   |                                  |                    |
| Ethylamine                 |                                                                                                                              | 20.9 wt.% (17°C) <sup>9</sup>                               |                                                          |                          |                         |                                     |                                   |                                   |                                   |                          |                                                    |                                                              |                                  |                                   |                                   |                                   |                                   |                                   |                                   |                                   |                                  |                    |
| Diethylamine               |                                                                                                                              | < 1 wt.% <sup>10</sup>                                      |                                                          |                          |                         |                                     |                                   |                                   |                                   |                          |                                                    |                                                              |                                  |                                   |                                   |                                   |                                   |                                   |                                   |                                   |                                  |                    |
| Triethylamine              | sol. <sup>5</sup>                                                                                                            | < 1 wt.% <sup>10</sup>                                      |                                                          |                          |                         | insol. <sup>11</sup>                |                                   |                                   |                                   |                          |                                                    |                                                              |                                  |                                   |                                   |                                   |                                   |                                   |                                   |                                   |                                  |                    |
| Trimethylamine             |                                                                                                                              |                                                             |                                                          |                          |                         | insol. <sup>11</sup>                |                                   |                                   |                                   |                          |                                                    |                                                              |                                  |                                   |                                   |                                   |                                   |                                   |                                   |                                   |                                  |                    |
| TMEDA                      |                                                                                                                              |                                                             |                                                          |                          |                         | sol. <sup>11</sup>                  |                                   |                                   |                                   |                          |                                                    |                                                              |                                  |                                   |                                   |                                   |                                   |                                   |                                   |                                   |                                  |                    |
| Ethylenediamine            |                                                                                                                              | 22 wt.% (75°C) <sup>4</sup>                                 | 3.9 wt.% (75°C) <sup>4</sup>                             |                          |                         |                                     |                                   |                                   |                                   | insol. <sup>4</sup>      |                                                    |                                                              |                                  |                                   |                                   |                                   |                                   |                                   |                                   |                                   |                                  |                    |
| n-Propyl amine             |                                                                                                                              | 9.7 wt.% <sup>4</sup>                                       |                                                          |                          |                         |                                     |                                   |                                   |                                   |                          |                                                    |                                                              |                                  |                                   |                                   |                                   |                                   |                                   |                                   |                                   |                                  |                    |
| Isopropyl amine            | 1270 mmol/L <sup>6</sup><br>3 - 4 g/L <sup>b 4</sup>                                                                         | 6.0 wt.% <sup>4</sup><br>1100 mmol/L                        | insol. <sup>b 8</sup>                                    |                          |                         | sol. <sup>12</sup>                  |                                   |                                   |                                   | insol. <sup>4,13</sup>   | sol. <sup>14</sup>                                 | sol. <sup>14</sup>                                           |                                  |                                   |                                   |                                   |                                   |                                   |                                   |                                   |                                  |                    |
| t-Butyl amine              |                                                                                                                              |                                                             |                                                          |                          |                         | sol. <sup>12</sup>                  |                                   |                                   |                                   |                          |                                                    |                                                              |                                  |                                   |                                   |                                   |                                   |                                   |                                   |                                   |                                  |                    |
| n-Butyl amine              |                                                                                                                              | 4.9 wt.% <sup>4</sup>                                       |                                                          |                          |                         |                                     |                                   |                                   |                                   |                          |                                                    |                                                              |                                  |                                   |                                   |                                   |                                   |                                   |                                   |                                   |                                  |                    |
| Cyclohexylamine            |                                                                                                                              | 1.8 wt.%                                                    |                                                          |                          |                         |                                     |                                   |                                   |                                   |                          |                                                    |                                                              |                                  |                                   |                                   |                                   |                                   |                                   |                                   |                                   |                                  |                    |
| Morpholine                 |                                                                                                                              | 1.4 wt.% <sup>b 4</sup>                                     |                                                          |                          |                         |                                     |                                   |                                   |                                   |                          |                                                    |                                                              |                                  |                                   |                                   |                                   |                                   |                                   |                                   |                                   |                                  |                    |
| Aniline                    |                                                                                                                              | 0.6 wt.%                                                    |                                                          |                          |                         |                                     |                                   |                                   |                                   |                          |                                                    |                                                              |                                  |                                   |                                   |                                   |                                   |                                   |                                   |                                   |                                  |                    |
| Pyridine                   |                                                                                                                              | 3.1 wt.% <sup>b 4</sup>                                     |                                                          |                          |                         | sol. <sup>12</sup>                  |                                   |                                   |                                   | insol. <sup>13</sup>     |                                                    |                                                              |                                  |                                   |                                   |                                   |                                   |                                   |                                   |                                   |                                  |                    |
| Ethanolamine               |                                                                                                                              | 7.7 wt.%                                                    |                                                          |                          |                         |                                     |                                   |                                   |                                   |                          |                                                    |                                                              |                                  |                                   |                                   |                                   |                                   |                                   |                                   |                                   |                                  |                    |
| 2-Propanol                 |                                                                                                                              | 0.25 wt.% <sup>4</sup><br>0.37 wt.% <sup>b 9</sup>          |                                                          |                          |                         |                                     |                                   |                                   |                                   |                          |                                                    | sol. <sup>14</sup>                                           |                                  |                                   |                                   |                                   |                                   |                                   |                                   |                                   |                                  |                    |
| t-Butanol                  |                                                                                                                              | 0.11 wt.% <sup>b 9</sup>                                    |                                                          |                          |                         |                                     |                                   |                                   |                                   |                          |                                                    |                                                              |                                  |                                   |                                   |                                   |                                   |                                   |                                   |                                   |                                  |                    |
| 2-Ethylhexanol             |                                                                                                                              | 0.01 wt.% <sup>b 9</sup>                                    |                                                          |                          |                         |                                     |                                   |                                   |                                   |                          |                                                    |                                                              |                                  |                                   |                                   |                                   |                                   |                                   |                                   |                                   |                                  |                    |
| Tetrahydrofurfuryl alcohol |                                                                                                                              | reac. (14.0 wt.%) <sup>4</sup>                              |                                                          |                          |                         |                                     |                                   |                                   |                                   |                          |                                                    |                                                              |                                  |                                   |                                   |                                   |                                   |                                   |                                   |                                   |                                  |                    |
| Monoglyme                  | 4700 mmol/L <sup>6</sup>                                                                                                     | 2.6 wt.% (0°C) <sup>4</sup><br>0.8 wt.% (20°C) <sup>9</sup> | insol. <sup>4</sup>                                      |                          |                         |                                     | 0.13 wt.% <sup>b 8</sup>          |                                   |                                   |                          |                                                    |                                                              |                                  |                                   |                                   |                                   |                                   |                                   |                                   |                                   |                                  |                    |
| Diglyme                    | 9.92 wt.% <sup>7</sup><br>4250 mmol/L <sup>6</sup>                                                                           | 5.5 wt.% <sup>b 4</sup>                                     | insol. (0.013 wt%) <sup>4</sup>                          |                          |                         |                                     |                                   |                                   |                                   |                          | sol. <sup>5</sup>                                  |                                                              |                                  |                                   |                                   |                                   |                                   |                                   |                                   |                                   |                                  |                    |
| Triglyme                   |                                                                                                                              | 8.7 wt.% <sup>b 4</sup>                                     | 0.1 wt.% (0°C) <sup>4</sup>                              |                          |                         |                                     |                                   |                                   |                                   |                          |                                                    |                                                              |                                  |                                   |                                   |                                   |                                   |                                   |                                   |                                   |                                  |                    |
| Tetraglyme                 |                                                                                                                              | 9.1 wt.% <sup>b 4</sup>                                     | insol. <sup>4</sup>                                      |                          |                         |                                     |                                   |                                   |                                   |                          |                                                    |                                                              |                                  |                                   |                                   |                                   |                                   |                                   |                                   |                                   |                                  |                    |
| DMF                        |                                                                                                                              | 18.0 wt.% <sup>4</sup>                                      | 15.0 wt.% <sup>4</sup>                                   |                          |                         |                                     |                                   |                                   |                                   |                          |                                                    | sol. <sup>14</sup>                                           |                                  |                                   |                                   |                                   |                                   |                                   |                                   |                                   |                                  |                    |
| Dimethylacetamide          |                                                                                                                              | 14.0 wt.% <sup>9</sup>                                      |                                                          |                          |                         |                                     |                                   |                                   |                                   |                          |                                                    |                                                              |                                  |                                   |                                   |                                   |                                   |                                   |                                   |                                   |                                  |                    |
| DMSO                       |                                                                                                                              | 5.8 wt.% <sup>b 9</sup>                                     |                                                          |                          |                         |                                     |                                   |                                   |                                   | 1.87 wt.% <sup>13</sup>  |                                                    |                                                              |                                  |                                   |                                   |                                   |                                   |                                   |                                   |                                   |                                  |                    |
| Acetonitrile               | sol. <sup>5</sup>                                                                                                            | 2.0 wt.% <sup>9</sup><br>< 1 wt.% <sup>10</sup>             | insol. <sup>1</sup>                                      |                          |                         |                                     |                                   |                                   |                                   | 0.4 wt.% <sup>b 13</sup> | sol. <sup>14</sup>                                 | sol. <sup>14</sup>                                           |                                  |                                   |                                   |                                   |                                   |                                   |                                   |                                   |                                  |                    |
| 1,4-Dioxane                | 0.3 wt.% <sup>8</sup>                                                                                                        | insol. <sup>10</sup>                                        | insol. <sup>6</sup>                                      |                          |                         |                                     | 0.1 wt.% <sup>b 8</sup>           |                                   |                                   | insol. <sup>13</sup>     |                                                    |                                                              |                                  |                                   |                                   |                                   |                                   |                                   |                                   |                                   |                                  |                    |
| 2-Ethoxyethanol            |                                                                                                                              | < 1 wt.% <sup>10</sup>                                      |                                                          |                          |                         |                                     |                                   |                                   |                                   | insol. <sup>13</sup>     |                                                    |                                                              |                                  |                                   |                                   |                                   |                                   |                                   |                                   |                                   |                                  |                    |
| 1,2-Diethoxyethane         |                                                                                                                              | < 1 wt.% <sup>10</sup>                                      |                                                          |                          |                         |                                     |                                   |                                   |                                   |                          |                                                    |                                                              |                                  |                                   |                                   |                                   |                                   |                                   |                                   |                                   |                                  |                    |
| Ethyl acetate              |                                                                                                                              | < 1 wt.% <sup>10</sup>                                      |                                                          |                          |                         |                                     |                                   |                                   |                                   | insol. <sup>4</sup>      |                                                    |                                                              |                                  |                                   |                                   |                                   |                                   |                                   |                                   |                                   |                                  |                    |
| Diethyl ether              | 1.4 M <sup>2</sup><br>4.5 wt.% <sup>8</sup><br>3 g/100 g (20°C) <sup>4</sup><br>28 g/100 g (39°C) <sup>4</sup>               | insol. <sup>8</sup>                                         | insol. <sup>1</sup>                                      | insol. <sup>b 8</sup>    | insol. <sup>b 8</sup>   | sol. (20.8 wt.%) <sup>b 5,6,8</sup> | insol. (0.045M) <sup>b 8</sup>    | insol. <sup>6,8</sup>             |                                   | insol. <sup>13</sup>     | insol. <sup>14</sup>                               | insol. <sup>14</sup>                                         |                                  |                                   |                                   |                                   |                                   |                                   |                                   |                                   |                                  | sol. <sup>17</sup> |
| Dimethyl ether             |                                                                                                                              |                                                             |                                                          |                          |                         |                                     |                                   |                                   |                                   |                          |                                                    |                                                              |                                  |                                   |                                   |                                   |                                   |                                   |                                   |                                   |                                  | sol. <sup>17</sup> |
| Trimethyl borate           |                                                                                                                              | < 1 wt.% <sup>10</sup>                                      |                                                          |                          |                         |                                     |                                   |                                   |                                   |                          |                                                    |                                                              |                                  |                                   |                                   |                                   |                                   |                                   |                                   |                                   |                                  |                    |
| Chloroform                 |                                                                                                                              |                                                             |                                                          |                          |                         |                                     |                                   |                                   |                                   | insol. <sup>13</sup>     | sol. <sup>14</sup>                                 | reac. <sup>14</sup>                                          |                                  |                                   |                                   |                                   |                                   |                                   |                                   |                                   |                                  |                    |
| Carbon disulfide           |                                                                                                                              |                                                             |                                                          |                          |                         |                                     |                                   |                                   |                                   |                          |                                                    |                                                              |                                  |                                   |                                   |                                   |                                   |                                   |                                   |                                   |                                  |                    |
| o-Bismethoxybenzene        | sol. <sup>5</sup>                                                                                                            |                                                             |                                                          |                          |                         |                                     |                                   |                                   |                                   |                          |                                                    |                                                              |                                  |                                   |                                   |                                   |                                   |                                   |                                   |                                   |                                  |                    |
| Benzene                    |                                                                                                                              |                                                             |                                                          |                          |                         |                                     |                                   |                                   |                                   | insol. <sup>4</sup>      | sol. <sup>5,14</sup>                               | insol. <sup>14</sup>                                         |                                  |                                   |                                   |                                   |                                   |                                   |                                   |                                   |                                  |                    |
| Dimethylsulfide            |                                                                                                                              |                                                             |                                                          |                          |                         | 60 mmol/L <sup>6</sup>              |                                   |                                   |                                   |                          |                                                    |                                                              | 50 mmol/L <sup>6</sup>           | 60 mmol/L <sup>6</sup>            |                                   |                                   | < 20 mmol/L <sup>6</sup>          |                                   | sol. <sup>6</sup>                 | sol. <sup>16</sup>                |                                  |                    |
| Dichloromethane            |                                                                                                                              |                                                             |                                                          |                          |                         |                                     |                                   |                                   |                                   |                          | 0.31 g/ml <sup>b 15</sup><br>1.2 M <sup>b 15</sup> | sol. (or 0.9 M) <sup>b 15</sup><br>0.13 g/ml <sup>b 15</sup> |                                  |                                   |                                   |                                   |                                   |                                   |                                   |                                   |                                  |                    |
| Dichloroethane             |                                                                                                                              |                                                             |                                                          |                          |                         |                                     |                                   |                                   |                                   |                          |                                                    |                                                              |                                  |                                   |                                   |                                   |                                   |                                   |                                   |                                   |                                  |                    |
| Hydrazine                  | 15.6 wt.%(RT) <sup>4</sup>                                                                                                   |                                                             |                                                          |                          |                         |                                     |                                   |                                   |                                   |                          |                                                    |                                                              |                                  |                                   |                                   |                                   |                                   |                                   |                                   |                                   |                                  |                    |
| Hexane                     |                                                                                                                              |                                                             |                                                          |                          |                         |                                     |                                   |                                   |                                   |                          |                                                    |                                                              |                                  |                                   |                                   |                                   |                                   |                                   |                                   |                                   |                                  |                    |
| Acetone                    |                                                                                                                              |                                                             |                                                          |                          |                         | reac.                               |                                   |                                   |                                   | insol. <sup>4</sup>      |                                                    |                                                              |                                  |                                   |                                   |                                   |                                   |                                   |                                   |                                   |                                  |                    |
| Cyclohexane                |                                                                                                                              |                                                             |                                                          |                          |                         |                                     |                                   |                                   |                                   |                          |                                                    |                                                              |                                  |                                   |                                   |                                   |                                   |                                   |                                   |                                   |                                  |                    |
| RNH <sub>2</sub>           |                                                                                                                              | sol. <sup>6</sup>                                           |                                                          |                          |                         |                                     |                                   |                                   |                                   |                          |                                                    |                                                              |                                  |                                   |                                   |                                   |                                   |                                   |                                   |                                   |                                  |                    |
| Carbon tetrachloride       |                                                                                                                              |                                                             |                                                          |                          |                         |                                     |                                   |                                   |                                   |                          |                                                    |                                                              |                                  |                                   |                                   |                                   |                                   |                                   |                                   |                                   |                                  |                    |
| Piperidine                 |                                                                                                                              |                                                             |                                                          |                          |                         | sol. <sup>12</sup>                  |                                   |                                   |                                   | insol. <sup>13</sup>     |                                                    |                                                              |                                  |                                   |                                   |                                   |                                   |                                   |                                   |                                   |                                  |                    |
| Benzylamine                |                                                                                                                              |                                                             |                                                          |                          |                         | sol. <sup>12</sup>                  |                                   |                                   |                                   |                          |                                                    |                                                              |                                  |                                   |                                   |                                   |                                   |                                   |                                   |                                   |                                  |                    |

Notes: <sup>a</sup> alkaline, \* the stability of BH<sub>4</sub><sup>-</sup> in water is enhanced in alkaline solutions (addition of acetic acid leads to strong reaction), <sup>b</sup> 25°C

closo-B10H10(2-) compounds

| Solvent         | Compound                                                                                                                                                    |                                                                                                                                                             |                                                                                                                                                           |                                                 |                                                 |                                                 |                                   |                                                                 |                                                                  |                                                                  |                                                                 |                                                                   |                                                                     |                                   |                                   |                                                 |                                                           |                                                            |                                                 |                                                |                                                    |
|-----------------|-------------------------------------------------------------------------------------------------------------------------------------------------------------|-------------------------------------------------------------------------------------------------------------------------------------------------------------|-----------------------------------------------------------------------------------------------------------------------------------------------------------|-------------------------------------------------|-------------------------------------------------|-------------------------------------------------|-----------------------------------|-----------------------------------------------------------------|------------------------------------------------------------------|------------------------------------------------------------------|-----------------------------------------------------------------|-------------------------------------------------------------------|---------------------------------------------------------------------|-----------------------------------|-----------------------------------|-------------------------------------------------|-----------------------------------------------------------|------------------------------------------------------------|-------------------------------------------------|------------------------------------------------|----------------------------------------------------|
|                 | Li <sub>2</sub> B <sub>10</sub> H <sub>10</sub> ·2.6H <sub>2</sub> O                                                                                        | Na <sub>2</sub> B <sub>10</sub> H <sub>10</sub> ·0.7H <sub>2</sub> O                                                                                        | K <sub>2</sub> B <sub>10</sub> H <sub>10</sub> ·0.6H <sub>2</sub> O                                                                                       | Ag <sub>2</sub> B <sub>10</sub> H <sub>10</sub> | Cs <sub>2</sub> B <sub>10</sub> H <sub>10</sub> | Tl <sub>2</sub> B <sub>10</sub> H <sub>10</sub> | HgB <sub>10</sub> H <sub>10</sub> | (R <sub>4</sub> N) <sub>2</sub> B <sub>10</sub> H <sub>10</sub> | (R <sub>3</sub> NH) <sub>2</sub> B <sub>10</sub> H <sub>10</sub> | R(R <sub>4</sub> P) <sub>2</sub> B <sub>10</sub> H <sub>10</sub> | (R <sub>3</sub> S) <sub>2</sub> B <sub>10</sub> H <sub>10</sub> | Ni(NH <sub>3</sub> ) <sub>6</sub> B <sub>10</sub> H <sub>10</sub> | [NH(ET) <sub>3</sub> ] <sub>2</sub> B <sub>10</sub> H <sub>10</sub> | CaB <sub>10</sub> H <sub>10</sub> | BaB <sub>10</sub> H <sub>10</sub> | Li <sub>2</sub> B <sub>10</sub> H <sub>10</sub> | [Ni(DMF) <sub>6</sub> ][B <sub>10</sub> H <sub>10</sub> ] | [Ni(DMSO) <sub>6</sub> ][B <sub>10</sub> H <sub>10</sub> ] | Na <sub>2</sub> B <sub>10</sub> H <sub>10</sub> | K <sub>2</sub> B <sub>10</sub> H <sub>10</sub> | (TEA) <sub>2</sub> B <sub>10</sub> H <sub>10</sub> |
| Water           | 18.8 g B/100 ml (4°C) <sup>18</sup><br>32.3 g B/100 ml (22°C) <sup>18</sup><br>54.3 g B/100 ml (40°C) <sup>18</sup><br>87.1 g B/100 ml (60°C) <sup>18</sup> | 13.9 g B/100 ml (4°C) <sup>18</sup><br>21.1 g B/100 ml (22°C) <sup>18</sup><br>37.2 g B/100 ml (40°C) <sup>18</sup><br>58.5 g B/100 ml (60°C) <sup>18</sup> | 6.4 g B/100 ml (4°C) <sup>18</sup><br>8.4 g B/100 ml (22°C) <sup>18</sup><br>16.5 g B/100 ml (40°C) <sup>18</sup><br>26.1 g B/100 ml (60°C) <sup>18</sup> | insol. <sup>19,20</sup>                         | insol. <sup>19</sup>                            | insol. <sup>19</sup>                            | insol. <sup>19</sup>              | insol. <sup>19</sup>                                            | insol. <sup>19</sup>                                             | insol. <sup>19</sup>                                             | insol. <sup>19</sup>                                            | insol. <sup>19</sup>                                              | vs. <sup>19</sup>                                                   | sol. <sup>19</sup>                | sol. <sup>19</sup>                | sol. <sup>21</sup>                              | reac. <sup>22</sup>                                       | reac. <sup>22</sup>                                        | sol. <sup>18</sup>                              |                                                |                                                    |
| Methanol        |                                                                                                                                                             |                                                                                                                                                             |                                                                                                                                                           |                                                 |                                                 |                                                 |                                   |                                                                 |                                                                  |                                                                  |                                                                 |                                                                   |                                                                     |                                   |                                   | sol. <sup>21</sup>                              |                                                           |                                                            |                                                 |                                                |                                                    |
| Ethanol         |                                                                                                                                                             |                                                                                                                                                             |                                                                                                                                                           |                                                 |                                                 |                                                 |                                   |                                                                 |                                                                  |                                                                  |                                                                 |                                                                   |                                                                     |                                   |                                   | sol. <sup>21</sup>                              |                                                           |                                                            | sol. <sup>23</sup>                              |                                                |                                                    |
| THF             |                                                                                                                                                             |                                                                                                                                                             |                                                                                                                                                           |                                                 |                                                 |                                                 |                                   |                                                                 |                                                                  |                                                                  |                                                                 |                                                                   |                                                                     |                                   |                                   | insol. <sup>21</sup>                            |                                                           |                                                            |                                                 |                                                |                                                    |
| 2-propanol      |                                                                                                                                                             |                                                                                                                                                             |                                                                                                                                                           |                                                 |                                                 |                                                 |                                   |                                                                 |                                                                  |                                                                  |                                                                 |                                                                   |                                                                     |                                   |                                   | sol. <sup>21</sup>                              |                                                           |                                                            | sol. <sup>24</sup>                              |                                                |                                                    |
| DMF             |                                                                                                                                                             |                                                                                                                                                             |                                                                                                                                                           |                                                 |                                                 |                                                 |                                   |                                                                 |                                                                  |                                                                  |                                                                 |                                                                   |                                                                     |                                   |                                   | sol. <sup>21</sup>                              |                                                           |                                                            |                                                 |                                                |                                                    |
| DMSO            |                                                                                                                                                             |                                                                                                                                                             |                                                                                                                                                           |                                                 |                                                 |                                                 |                                   |                                                                 |                                                                  |                                                                  |                                                                 |                                                                   |                                                                     |                                   |                                   | sol. <sup>21</sup>                              |                                                           |                                                            |                                                 |                                                |                                                    |
| Acetonitrile    |                                                                                                                                                             |                                                                                                                                                             |                                                                                                                                                           |                                                 |                                                 |                                                 |                                   |                                                                 |                                                                  |                                                                  |                                                                 |                                                                   |                                                                     |                                   |                                   | sol. <sup>21</sup>                              | reac. <sup>22</sup>                                       | reac. <sup>22</sup>                                        |                                                 | sol. <sup>26</sup>                             | sol. <sup>14</sup>                                 |
| Diethyl ether   |                                                                                                                                                             |                                                                                                                                                             |                                                                                                                                                           |                                                 |                                                 |                                                 |                                   |                                                                 |                                                                  |                                                                  |                                                                 |                                                                   |                                                                     |                                   |                                   |                                                 |                                                           |                                                            | sol. <sup>25</sup>                              |                                                |                                                    |
| Dichloromethane |                                                                                                                                                             |                                                                                                                                                             |                                                                                                                                                           |                                                 |                                                 |                                                 |                                   |                                                                 |                                                                  |                                                                  |                                                                 |                                                                   |                                                                     |                                   |                                   | insol. <sup>21</sup>                            |                                                           |                                                            |                                                 |                                                |                                                    |
| Acetone         |                                                                                                                                                             |                                                                                                                                                             |                                                                                                                                                           |                                                 |                                                 |                                                 |                                   |                                                                 |                                                                  |                                                                  |                                                                 |                                                                   |                                                                     |                                   |                                   | sol. <sup>21</sup>                              |                                                           |                                                            |                                                 |                                                |                                                    |
| 2-Butanol       |                                                                                                                                                             |                                                                                                                                                             |                                                                                                                                                           |                                                 |                                                 |                                                 |                                   |                                                                 |                                                                  |                                                                  |                                                                 |                                                                   |                                                                     |                                   |                                   | sol. <sup>21</sup>                              |                                                           |                                                            |                                                 |                                                |                                                    |
| 2-Butanone      |                                                                                                                                                             |                                                                                                                                                             |                                                                                                                                                           |                                                 |                                                 |                                                 |                                   |                                                                 |                                                                  |                                                                  |                                                                 |                                                                   |                                                                     |                                   |                                   | reac. <sup>21</sup>                             |                                                           |                                                            |                                                 |                                                |                                                    |
| Toluene         |                                                                                                                                                             |                                                                                                                                                             |                                                                                                                                                           |                                                 |                                                 |                                                 |                                   |                                                                 |                                                                  |                                                                  |                                                                 |                                                                   |                                                                     |                                   |                                   | insol. <sup>21</sup>                            |                                                           |                                                            |                                                 |                                                |                                                    |
| Cyclohexane     |                                                                                                                                                             |                                                                                                                                                             |                                                                                                                                                           |                                                 |                                                 |                                                 |                                   |                                                                 |                                                                  |                                                                  |                                                                 |                                                                   |                                                                     |                                   |                                   | insol. <sup>21</sup>                            |                                                           |                                                            |                                                 |                                                |                                                    |

closo-B12H12(2-) compounds

| Solvent             | Compound                                        |                                                                                                                                                             |                                                 |                                                                                                                                                             |                                                |                                                                                                                                                           |                                                                                   |                                                 |                                                 |                                                 |                                   |                                                                 |                                                                  |                                                                  |                                                                 |                                                                   |                                                                     |                                   |                                   |                                                                  |  |
|---------------------|-------------------------------------------------|-------------------------------------------------------------------------------------------------------------------------------------------------------------|-------------------------------------------------|-------------------------------------------------------------------------------------------------------------------------------------------------------------|------------------------------------------------|-----------------------------------------------------------------------------------------------------------------------------------------------------------|-----------------------------------------------------------------------------------|-------------------------------------------------|-------------------------------------------------|-------------------------------------------------|-----------------------------------|-----------------------------------------------------------------|------------------------------------------------------------------|------------------------------------------------------------------|-----------------------------------------------------------------|-------------------------------------------------------------------|---------------------------------------------------------------------|-----------------------------------|-----------------------------------|------------------------------------------------------------------|--|
|                     | Na <sub>2</sub> B <sub>12</sub> H <sub>12</sub> | Na <sub>2</sub> B <sub>12</sub> H <sub>12</sub> ·1.5H <sub>2</sub> O                                                                                        | Li <sub>2</sub> B <sub>12</sub> H <sub>12</sub> | Li <sub>2</sub> B <sub>12</sub> H <sub>12</sub> ·3H <sub>2</sub> O                                                                                          | K <sub>2</sub> B <sub>12</sub> H <sub>12</sub> | K <sub>2</sub> B <sub>12</sub> H <sub>12</sub> ·1.3H <sub>2</sub> O                                                                                       | [(CH <sub>3</sub> ) <sub>3</sub> NH] <sub>2</sub> B <sub>12</sub> H <sub>12</sub> | Ag <sub>2</sub> B <sub>12</sub> H <sub>12</sub> | Cs <sub>2</sub> B <sub>12</sub> H <sub>12</sub> | Tl <sub>2</sub> B <sub>12</sub> H <sub>12</sub> | HgB <sub>12</sub> H <sub>12</sub> | (R <sub>4</sub> N) <sub>2</sub> B <sub>12</sub> H <sub>12</sub> | (R <sub>3</sub> NH) <sub>2</sub> B <sub>12</sub> H <sub>12</sub> | R(R <sub>4</sub> P) <sub>2</sub> B <sub>12</sub> H <sub>12</sub> | (R <sub>3</sub> S) <sub>2</sub> B <sub>12</sub> H <sub>12</sub> | Ni(NH <sub>3</sub> ) <sub>6</sub> B <sub>12</sub> H <sub>12</sub> | [NH(Et) <sub>3</sub> ] <sub>2</sub> B <sub>12</sub> H <sub>12</sub> | CaB <sub>12</sub> H <sub>12</sub> | BaB <sub>12</sub> H <sub>12</sub> | (Me <sub>4</sub> N) <sub>2</sub> B <sub>12</sub> H <sub>12</sub> |  |
| Water               | sol. <sup>18,24</sup>                           | 13.1 g B/100 ml (4°C) <sup>18</sup><br>21.4 g B/100 ml (22°C) <sup>18</sup><br>32.0 g B/100 ml (40°C) <sup>18</sup><br>47.3 g B/100 ml (60°C) <sup>18</sup> | sol. <sup>18,21</sup>                           | 16.8 g B/100 ml (4°C) <sup>18</sup><br>27.9 g B/100 ml (22°C) <sup>18</sup><br>41.6 g B/100 ml (40°C) <sup>18</sup><br>67.0 g B/100 ml (60°C) <sup>18</sup> | sol. <sup>18</sup>                             | 6.6 g B/100 ml (4°C) <sup>18</sup><br>9.2 g B/100 ml (22°C) <sup>18</sup><br>20.0 g B/100 ml (40°C) <sup>18</sup><br>32.2 g B/100 ml (60°C) <sup>18</sup> | insol. <sup>31</sup>                                                              | insol. <sup>19,20</sup>                         | insol. <sup>19</sup>                            | insol. <sup>19</sup>                            | insol. <sup>19</sup>              | insol. <sup>19</sup>                                            | insol. <sup>19</sup>                                             | insol. <sup>19</sup>                                             | insol. <sup>19</sup>                                            | insol. <sup>19</sup>                                              | insol. <sup>19</sup>                                                | sol. <sup>19</sup>                | sol. <sup>19</sup>                | sol. <sup>b,33</sup>                                             |  |
| Methanol            |                                                 |                                                                                                                                                             | sol. <sup>21</sup>                              |                                                                                                                                                             |                                                |                                                                                                                                                           |                                                                                   |                                                 |                                                 |                                                 |                                   |                                                                 |                                                                  |                                                                  |                                                                 |                                                                   |                                                                     |                                   |                                   |                                                                  |  |
| Ethanol             | sol. <sup>27</sup>                              |                                                                                                                                                             | sol. <sup>21</sup>                              |                                                                                                                                                             |                                                |                                                                                                                                                           |                                                                                   |                                                 |                                                 |                                                 |                                   |                                                                 |                                                                  |                                                                  |                                                                 |                                                                   |                                                                     |                                   |                                   |                                                                  |  |
| THF                 | sol. <sup>28</sup>                              |                                                                                                                                                             | insol. <sup>21</sup>                            |                                                                                                                                                             |                                                |                                                                                                                                                           |                                                                                   |                                                 |                                                 |                                                 |                                   |                                                                 |                                                                  |                                                                  |                                                                 |                                                                   |                                                                     |                                   |                                   |                                                                  |  |
| 2-Propanol          | sol. <sup>24</sup>                              |                                                                                                                                                             | sol. <sup>21</sup>                              |                                                                                                                                                             |                                                |                                                                                                                                                           |                                                                                   |                                                 |                                                 |                                                 |                                   |                                                                 |                                                                  |                                                                  |                                                                 |                                                                   |                                                                     |                                   |                                   |                                                                  |  |
| Diglyme             |                                                 |                                                                                                                                                             |                                                 |                                                                                                                                                             | sl. <sup>31</sup>                              |                                                                                                                                                           |                                                                                   |                                                 |                                                 |                                                 |                                   |                                                                 |                                                                  |                                                                  |                                                                 |                                                                   |                                                                     |                                   |                                   |                                                                  |  |
| DMF                 |                                                 |                                                                                                                                                             | sol. <sup>21</sup>                              |                                                                                                                                                             |                                                |                                                                                                                                                           |                                                                                   |                                                 |                                                 |                                                 |                                   |                                                                 |                                                                  |                                                                  |                                                                 |                                                                   |                                                                     |                                   |                                   |                                                                  |  |
| DMSO                |                                                 |                                                                                                                                                             | sol. <sup>21</sup>                              |                                                                                                                                                             |                                                |                                                                                                                                                           |                                                                                   |                                                 |                                                 |                                                 |                                   |                                                                 |                                                                  |                                                                  |                                                                 |                                                                   |                                                                     |                                   |                                   |                                                                  |  |
| Acetonitrile        |                                                 |                                                                                                                                                             | sol. <sup>21</sup>                              |                                                                                                                                                             | sol. (0.035 M) <sup>a,32</sup>                 |                                                                                                                                                           |                                                                                   |                                                 |                                                 |                                                 |                                   |                                                                 |                                                                  |                                                                  |                                                                 |                                                                   |                                                                     |                                   |                                   |                                                                  |  |
| Dichloroethane      |                                                 |                                                                                                                                                             | insol. <sup>21</sup>                            |                                                                                                                                                             |                                                |                                                                                                                                                           |                                                                                   |                                                 |                                                 |                                                 |                                   |                                                                 |                                                                  |                                                                  |                                                                 |                                                                   |                                                                     |                                   |                                   |                                                                  |  |
| Acetone             |                                                 |                                                                                                                                                             | sol. (0.15 M) <sup>21,29</sup>                  |                                                                                                                                                             |                                                |                                                                                                                                                           |                                                                                   |                                                 |                                                 |                                                 |                                   |                                                                 |                                                                  |                                                                  |                                                                 |                                                                   |                                                                     |                                   |                                   |                                                                  |  |
| Propylene carbonate |                                                 |                                                                                                                                                             | insol. <sup>30</sup>                            |                                                                                                                                                             |                                                |                                                                                                                                                           |                                                                                   |                                                 |                                                 |                                                 |                                   |                                                                 |                                                                  |                                                                  |                                                                 |                                                                   |                                                                     |                                   |                                   |                                                                  |  |
| EC-DMC              |                                                 |                                                                                                                                                             | insol. <sup>30</sup>                            |                                                                                                                                                             |                                                |                                                                                                                                                           |                                                                                   |                                                 |                                                 |                                                 |                                   |                                                                 |                                                                  |                                                                  |                                                                 |                                                                   |                                                                     |                                   |                                   |                                                                  |  |
| BMIM-TFSI           |                                                 |                                                                                                                                                             | insol. <sup>30</sup>                            |                                                                                                                                                             |                                                |                                                                                                                                                           |                                                                                   |                                                 |                                                 |                                                 |                                   |                                                                 |                                                                  |                                                                  |                                                                 |                                                                   |                                                                     |                                   |                                   |                                                                  |  |
| 2-Butanol           |                                                 |                                                                                                                                                             | sol. <sup>21</sup>                              |                                                                                                                                                             |                                                |                                                                                                                                                           |                                                                                   |                                                 |                                                 |                                                 |                                   |                                                                 |                                                                  |                                                                  |                                                                 |                                                                   |                                                                     |                                   |                                   |                                                                  |  |
| 2-Butanone          |                                                 |                                                                                                                                                             | reac. <sup>21</sup>                             |                                                                                                                                                             |                                                |                                                                                                                                                           |                                                                                   |                                                 |                                                 |                                                 |                                   |                                                                 |                                                                  |                                                                  |                                                                 |                                                                   |                                                                     |                                   |                                   |                                                                  |  |
| Toluene             |                                                 |                                                                                                                                                             | insol. <sup>21</sup>                            |                                                                                                                                                             |                                                |                                                                                                                                                           |                                                                                   |                                                 |                                                 |                                                 |                                   |                                                                 |                                                                  |                                                                  |                                                                 |                                                                   |                                                                     |                                   |                                   |                                                                  |  |
| Cyclohexane         |                                                 |                                                                                                                                                             | insol. <sup>21</sup>                            |                                                                                                                                                             |                                                |                                                                                                                                                           |                                                                                   |                                                 |                                                 |                                                 |                                   |                                                                 |                                                                  |                                                                  |                                                                 |                                                                   |                                                                     |                                   |                                   |                                                                  |  |

Notes: <sup>a</sup> in 0.3% water containing acetonitrile, <sup>b</sup> boiling

**nido-B11H14(-) compounds**

| Solvent       | Compound                          |                                   |                                                                    |                                                                    |                                                                                   |                                                                     |                                                         |                                                         |                                   |                                   |                                  |                                    |                                             |                                              |
|---------------|-----------------------------------|-----------------------------------|--------------------------------------------------------------------|--------------------------------------------------------------------|-----------------------------------------------------------------------------------|---------------------------------------------------------------------|---------------------------------------------------------|---------------------------------------------------------|-----------------------------------|-----------------------------------|----------------------------------|------------------------------------|---------------------------------------------|----------------------------------------------|
|               | RbB <sub>11</sub> H <sub>14</sub> | CsB <sub>11</sub> H <sub>14</sub> | [(CH <sub>3</sub> ) <sub>4</sub> N]B <sub>11</sub> H <sub>14</sub> | [(CH <sub>3</sub> ) <sub>3</sub> S]B <sub>11</sub> H <sub>14</sub> | [(C <sub>2</sub> H <sub>5</sub> ) <sub>3</sub> NH]B <sub>11</sub> H <sub>14</sub> | [(CH <sub>3</sub> ) <sub>3</sub> NH]B <sub>11</sub> H <sub>14</sub> | Ca(B <sub>11</sub> H <sub>14</sub> ) <sub>2</sub> · 4Dg | Nd(B <sub>11</sub> H <sub>14</sub> ) <sub>3</sub> · 4Dg | NaB <sub>11</sub> H <sub>14</sub> | LiB <sub>11</sub> H <sub>14</sub> | KB <sub>11</sub> H <sub>14</sub> | TEAB <sub>11</sub> H <sub>14</sub> | NaB <sub>11</sub> H <sub>14</sub> ·ndioxane | B <sub>11</sub> H <sub>14</sub> <sup>-</sup> |
| Water         | insol. <sup>34</sup>              | insol. <sup>34</sup>              | insol. <sup>34</sup>                                               | insol. <sup>34</sup>                                               | insol. <sup>34</sup>                                                              | insol. <sup>34</sup>                                                | sol. <sup>38</sup>                                      | sol. <sup>39</sup>                                      |                                   |                                   |                                  |                                    |                                             |                                              |
| THF           |                                   |                                   |                                                                    |                                                                    |                                                                                   | sol. <sup>35</sup>                                                  | sol. <sup>38</sup>                                      | sol. <sup>39</sup>                                      |                                   | sol. <sup>35</sup>                |                                  |                                    |                                             |                                              |
| 2-Propanol    |                                   |                                   |                                                                    |                                                                    |                                                                                   |                                                                     |                                                         | sl. <sup>39</sup>                                       |                                   |                                   |                                  |                                    |                                             |                                              |
| Diglyme       |                                   |                                   |                                                                    |                                                                    |                                                                                   |                                                                     | sol. <sup>38</sup>                                      | sol. <sup>39</sup>                                      | sol. <sup>36</sup>                |                                   |                                  |                                    | insol. <sup>28</sup>                        | sol. <sup>31</sup>                           |
| DMSO          |                                   |                                   |                                                                    |                                                                    |                                                                                   |                                                                     |                                                         |                                                         | sol. <sup>b 36</sup>              | sol. <sup>b 36</sup>              | sol. <sup>b 36</sup>             |                                    |                                             |                                              |
| Acetonitrile  |                                   |                                   |                                                                    |                                                                    |                                                                                   | sol. <sup>a 36,37</sup>                                             |                                                         |                                                         |                                   |                                   |                                  |                                    |                                             |                                              |
| Diethyl ether |                                   |                                   |                                                                    |                                                                    |                                                                                   |                                                                     |                                                         |                                                         |                                   |                                   |                                  | insol. <sup>40</sup>               |                                             |                                              |
| Hexane        |                                   |                                   |                                                                    |                                                                    |                                                                                   |                                                                     | insol. <sup>38</sup>                                    | insol. <sup>39</sup>                                    |                                   |                                   |                                  |                                    |                                             |                                              |
| Acetone       |                                   |                                   |                                                                    |                                                                    |                                                                                   |                                                                     |                                                         |                                                         |                                   |                                   |                                  | 10 g/ 100 mL <sup>40</sup>         |                                             |                                              |
| Pentane       |                                   |                                   |                                                                    |                                                                    |                                                                                   |                                                                     | insol. <sup>38</sup>                                    | insol. <sup>39</sup>                                    |                                   |                                   |                                  |                                    |                                             |                                              |

**Notes:** <sup>a</sup> in deuterated acetonitrile (CD<sub>3</sub>CN), <sup>b</sup> in DMSO-d<sub>6</sub>

Other compounds

| Solvent                      | $[(\text{hex})_2\text{N}]_2\text{B}_{12}\text{Cl}_{12}$ | $\text{Na}_2\text{B}_{12}\text{H}_6\text{Br}_6$ | $\text{Li}_2\text{B}_{12}(\text{OH})_{12}$<br>$3 \times 10^{-3} \text{ M}^{a,41}$ | $\text{Na}_2\text{B}_{12}(\text{OH})_{12}$<br>$7.2 \times 10^{-3} \text{ M}^{a,41}$ | $\text{K}_2\text{B}_{12}(\text{OH})_{12}$<br>$2.8 \times 10^{-3} \text{ M}^{a,41}$ | $\text{Rb}_2\text{B}_{12}(\text{OH})_{12}$<br>$5.4 \times 10^{-3} \text{ M}^{a,41}$ | $\text{Cs}_2\text{B}_{12}(\text{OH})_{12}$<br>$7.8 \times 10^{-3} \text{ M}^{a,41}$ | $(\text{NH}_4)_2\text{B}_{12}(\text{OH})_{12}$<br>$8.4 \times 10^{-3} \text{ M}^{a,41}$ | $(\text{H}_3\text{O})_2\text{B}_{12}(\text{OH})_{12}$<br>$1.9 \times 10^{-3} \text{ M}^{a,41}$ | $\text{B}_9\text{H}_{14}^-$ | $1,6\text{-}(\text{CH}_3)_2\text{SB}_{10}\text{H}_8\text{NH}_3$ | $2,4\text{-B}_{10}\text{H}_8(\text{NH}_3)_2$ | $\text{B}_{12}\text{H}_{10}[\text{N}(\text{CH}_3)_2]_2$ | $1,1,2\text{-B}_{12}\text{H}_{10}(\text{NH}_3)_2$ | $\text{Cu}_2(\text{CH}_3\text{CN})_4[\text{B}_{10}\text{H}_{10}]$ | $\{(\text{p-Cymene})\text{Ru}[\text{S}_2\text{C}_2(\text{B}_{10}\text{H}_{10})]\text{-Mo}(\text{CO})_2((\text{CO})_2\text{Ru}[\text{S}_2\text{C}_2(\text{B}_{10}\text{H}_{10})])\}$ | $(\text{COD})_2\text{Rh}_2[\text{I}_2\text{-S}_2\text{C}_2\text{B}_{10}\text{H}_{10}]$ | $(\text{COD})_2\text{Rh}_2[\text{I}_2\text{-Se}_2\text{C}_2\text{B}_{10}\text{H}_{10}]$ | $[\text{Ni}(\text{DMF})_4][\text{B}_{10}\text{H}_{10}]$ | $[\text{Ni}(\text{DMSO})_4][\text{B}_{10}\text{H}_{10}]$ | $[(\text{CH}_3)_4\text{N}]_2\text{B}_{10}\text{H}_{18}$ |                    |
|------------------------------|---------------------------------------------------------|-------------------------------------------------|-----------------------------------------------------------------------------------|-------------------------------------------------------------------------------------|------------------------------------------------------------------------------------|-------------------------------------------------------------------------------------|-------------------------------------------------------------------------------------|-----------------------------------------------------------------------------------------|------------------------------------------------------------------------------------------------|-----------------------------|-----------------------------------------------------------------|----------------------------------------------|---------------------------------------------------------|---------------------------------------------------|-------------------------------------------------------------------|-------------------------------------------------------------------------------------------------------------------------------------------------------------------------------------|----------------------------------------------------------------------------------------|-----------------------------------------------------------------------------------------|---------------------------------------------------------|----------------------------------------------------------|---------------------------------------------------------|--------------------|
| Water                        | insol. <sup>20</sup>                                    |                                                 |                                                                                   |                                                                                     |                                                                                    |                                                                                     |                                                                                     |                                                                                         |                                                                                                |                             |                                                                 |                                              |                                                         |                                                   |                                                                   |                                                                                                                                                                                     |                                                                                        |                                                                                         |                                                         | reac. <sup>22</sup>                                      | reac. <sup>22</sup>                                     |                    |
| Methanol                     | sol. <sup>20</sup>                                      |                                                 |                                                                                   |                                                                                     |                                                                                    |                                                                                     |                                                                                     |                                                                                         |                                                                                                |                             |                                                                 |                                              |                                                         |                                                   |                                                                   |                                                                                                                                                                                     |                                                                                        |                                                                                         |                                                         |                                                          |                                                         |                    |
| Ethanol                      |                                                         |                                                 |                                                                                   |                                                                                     |                                                                                    |                                                                                     |                                                                                     |                                                                                         |                                                                                                |                             |                                                                 |                                              |                                                         |                                                   |                                                                   |                                                                                                                                                                                     |                                                                                        |                                                                                         |                                                         |                                                          |                                                         |                    |
| THF                          |                                                         | sol. <sup>20</sup>                              |                                                                                   |                                                                                     |                                                                                    |                                                                                     |                                                                                     |                                                                                         |                                                                                                |                             |                                                                 |                                              |                                                         |                                                   |                                                                   |                                                                                                                                                                                     |                                                                                        | sol. <sup>45</sup>                                                                      | sol. <sup>45</sup>                                      |                                                          |                                                         |                    |
| Ammonia                      |                                                         |                                                 |                                                                                   |                                                                                     |                                                                                    |                                                                                     |                                                                                     |                                                                                         |                                                                                                |                             |                                                                 |                                              |                                                         |                                                   |                                                                   |                                                                                                                                                                                     |                                                                                        |                                                                                         |                                                         |                                                          |                                                         |                    |
| 2-Propanol                   |                                                         |                                                 |                                                                                   |                                                                                     |                                                                                    |                                                                                     |                                                                                     |                                                                                         |                                                                                                |                             |                                                                 |                                              |                                                         |                                                   |                                                                   |                                                                                                                                                                                     |                                                                                        |                                                                                         |                                                         |                                                          |                                                         |                    |
| t-Butanol                    |                                                         |                                                 |                                                                                   |                                                                                     |                                                                                    |                                                                                     |                                                                                     |                                                                                         |                                                                                                |                             |                                                                 |                                              |                                                         |                                                   |                                                                   |                                                                                                                                                                                     |                                                                                        |                                                                                         |                                                         |                                                          |                                                         |                    |
| 2-Ethylhexanol               |                                                         |                                                 |                                                                                   |                                                                                     |                                                                                    |                                                                                     |                                                                                     |                                                                                         |                                                                                                |                             |                                                                 |                                              |                                                         |                                                   |                                                                   |                                                                                                                                                                                     |                                                                                        |                                                                                         |                                                         |                                                          |                                                         |                    |
| Tetrahydrofurfuryl alcohol   |                                                         |                                                 |                                                                                   |                                                                                     |                                                                                    |                                                                                     |                                                                                     |                                                                                         |                                                                                                |                             |                                                                 |                                              |                                                         |                                                   |                                                                   |                                                                                                                                                                                     |                                                                                        |                                                                                         |                                                         |                                                          |                                                         |                    |
| Diglyme                      |                                                         |                                                 |                                                                                   |                                                                                     |                                                                                    |                                                                                     |                                                                                     |                                                                                         |                                                                                                | sol. <sup>31</sup>          |                                                                 |                                              |                                                         |                                                   |                                                                   |                                                                                                                                                                                     |                                                                                        |                                                                                         |                                                         |                                                          |                                                         |                    |
| DMSO                         |                                                         |                                                 |                                                                                   |                                                                                     |                                                                                    |                                                                                     |                                                                                     |                                                                                         |                                                                                                |                             |                                                                 |                                              |                                                         |                                                   |                                                                   |                                                                                                                                                                                     |                                                                                        |                                                                                         |                                                         |                                                          |                                                         |                    |
| Acetonitrile                 |                                                         |                                                 |                                                                                   |                                                                                     |                                                                                    |                                                                                     |                                                                                     |                                                                                         |                                                                                                |                             |                                                                 |                                              |                                                         | sl. <sup>43</sup>                                 |                                                                   |                                                                                                                                                                                     |                                                                                        |                                                                                         |                                                         | reac. <sup>22</sup>                                      | reac. <sup>22</sup>                                     | sol. <sup>46</sup> |
| 1,4-Dioxane                  | sl. <sup>20</sup>                                       |                                                 |                                                                                   |                                                                                     |                                                                                    |                                                                                     |                                                                                     |                                                                                         |                                                                                                |                             |                                                                 |                                              |                                                         |                                                   |                                                                   |                                                                                                                                                                                     |                                                                                        |                                                                                         |                                                         |                                                          |                                                         |                    |
| Ethyl acetate                |                                                         |                                                 |                                                                                   |                                                                                     |                                                                                    |                                                                                     |                                                                                     |                                                                                         |                                                                                                |                             |                                                                 |                                              |                                                         |                                                   |                                                                   |                                                                                                                                                                                     |                                                                                        |                                                                                         |                                                         |                                                          |                                                         |                    |
| Diethyl ether                |                                                         |                                                 |                                                                                   |                                                                                     |                                                                                    |                                                                                     |                                                                                     |                                                                                         |                                                                                                |                             |                                                                 |                                              |                                                         |                                                   |                                                                   |                                                                                                                                                                                     |                                                                                        |                                                                                         |                                                         |                                                          |                                                         |                    |
| Chloroform                   |                                                         |                                                 |                                                                                   |                                                                                     |                                                                                    |                                                                                     |                                                                                     |                                                                                         |                                                                                                |                             |                                                                 |                                              |                                                         |                                                   |                                                                   |                                                                                                                                                                                     |                                                                                        |                                                                                         |                                                         |                                                          |                                                         |                    |
| Carbon disulfide             | sl. <sup>20</sup>                                       |                                                 |                                                                                   |                                                                                     |                                                                                    |                                                                                     |                                                                                     |                                                                                         |                                                                                                |                             |                                                                 |                                              |                                                         |                                                   |                                                                   |                                                                                                                                                                                     |                                                                                        |                                                                                         |                                                         |                                                          |                                                         |                    |
| o-Bismethoxybenzene          |                                                         |                                                 |                                                                                   |                                                                                     |                                                                                    |                                                                                     |                                                                                     |                                                                                         |                                                                                                |                             |                                                                 |                                              |                                                         |                                                   |                                                                   |                                                                                                                                                                                     |                                                                                        |                                                                                         |                                                         |                                                          |                                                         |                    |
| Benzene                      | insol. <sup>20</sup>                                    |                                                 |                                                                                   |                                                                                     |                                                                                    |                                                                                     |                                                                                     |                                                                                         |                                                                                                |                             |                                                                 |                                              |                                                         |                                                   |                                                                   |                                                                                                                                                                                     |                                                                                        |                                                                                         |                                                         |                                                          |                                                         |                    |
| Dichloromethane              |                                                         |                                                 |                                                                                   |                                                                                     |                                                                                    |                                                                                     |                                                                                     |                                                                                         |                                                                                                |                             |                                                                 |                                              |                                                         |                                                   |                                                                   |                                                                                                                                                                                     | sol. <sup>44</sup>                                                                     |                                                                                         |                                                         |                                                          |                                                         |                    |
| Hexane                       | insol. <sup>20</sup>                                    |                                                 |                                                                                   |                                                                                     |                                                                                    |                                                                                     |                                                                                     |                                                                                         |                                                                                                |                             |                                                                 |                                              |                                                         |                                                   |                                                                   |                                                                                                                                                                                     | sl. <sup>44</sup>                                                                      | sl. <sup>45</sup>                                                                       | sl. <sup>45</sup>                                       |                                                          |                                                         |                    |
| Acetone                      | sol. <sup>20</sup>                                      |                                                 |                                                                                   |                                                                                     |                                                                                    |                                                                                     |                                                                                     |                                                                                         |                                                                                                |                             |                                                                 |                                              |                                                         |                                                   |                                                                   |                                                                                                                                                                                     |                                                                                        |                                                                                         |                                                         |                                                          |                                                         |                    |
| Propylene carbonate          |                                                         |                                                 |                                                                                   |                                                                                     |                                                                                    |                                                                                     |                                                                                     |                                                                                         |                                                                                                |                             |                                                                 |                                              |                                                         |                                                   |                                                                   |                                                                                                                                                                                     |                                                                                        |                                                                                         |                                                         |                                                          |                                                         |                    |
| Methylene chloride           | sol. <sup>20</sup>                                      |                                                 |                                                                                   |                                                                                     |                                                                                    |                                                                                     |                                                                                     |                                                                                         |                                                                                                |                             |                                                                 |                                              |                                                         |                                                   |                                                                   |                                                                                                                                                                                     |                                                                                        |                                                                                         |                                                         |                                                          |                                                         |                    |
| 2-Butanol                    |                                                         |                                                 |                                                                                   |                                                                                     |                                                                                    |                                                                                     |                                                                                     |                                                                                         |                                                                                                |                             |                                                                 |                                              |                                                         |                                                   |                                                                   |                                                                                                                                                                                     |                                                                                        |                                                                                         |                                                         |                                                          |                                                         |                    |
| Toluene                      |                                                         |                                                 |                                                                                   |                                                                                     |                                                                                    |                                                                                     |                                                                                     |                                                                                         |                                                                                                |                             |                                                                 |                                              |                                                         |                                                   |                                                                   |                                                                                                                                                                                     |                                                                                        |                                                                                         |                                                         |                                                          |                                                         |                    |
| Cyclohexane                  |                                                         |                                                 |                                                                                   |                                                                                     |                                                                                    |                                                                                     |                                                                                     |                                                                                         |                                                                                                |                             |                                                                 |                                              |                                                         |                                                   |                                                                   |                                                                                                                                                                                     |                                                                                        |                                                                                         |                                                         |                                                          |                                                         |                    |
| Pentane                      |                                                         |                                                 |                                                                                   |                                                                                     |                                                                                    |                                                                                     |                                                                                     |                                                                                         |                                                                                                |                             |                                                                 |                                              |                                                         |                                                   |                                                                   |                                                                                                                                                                                     |                                                                                        |                                                                                         |                                                         |                                                          |                                                         |                    |
| DME/1,3-dioxolane mixture    |                                                         |                                                 |                                                                                   |                                                                                     |                                                                                    |                                                                                     |                                                                                     |                                                                                         |                                                                                                |                             |                                                                 |                                              |                                                         |                                                   |                                                                   |                                                                                                                                                                                     |                                                                                        |                                                                                         |                                                         |                                                          |                                                         |                    |
| DME                          |                                                         |                                                 |                                                                                   |                                                                                     |                                                                                    |                                                                                     |                                                                                     |                                                                                         |                                                                                                |                             |                                                                 |                                              |                                                         |                                                   |                                                                   |                                                                                                                                                                                     |                                                                                        |                                                                                         |                                                         |                                                          |                                                         |                    |
| 1,3- dioxolane               |                                                         |                                                 |                                                                                   |                                                                                     |                                                                                    |                                                                                     |                                                                                     |                                                                                         |                                                                                                |                             |                                                                 |                                              |                                                         |                                                   |                                                                   |                                                                                                                                                                                     |                                                                                        |                                                                                         |                                                         |                                                          |                                                         |                    |
| Carbon tetrachloride         |                                                         |                                                 |                                                                                   |                                                                                     |                                                                                    |                                                                                     |                                                                                     |                                                                                         |                                                                                                |                             |                                                                 |                                              |                                                         |                                                   |                                                                   |                                                                                                                                                                                     |                                                                                        |                                                                                         |                                                         |                                                          |                                                         |                    |
| Alcohols                     |                                                         |                                                 |                                                                                   |                                                                                     |                                                                                    |                                                                                     |                                                                                     |                                                                                         |                                                                                                |                             |                                                                 |                                              |                                                         |                                                   |                                                                   |                                                                                                                                                                                     |                                                                                        |                                                                                         |                                                         |                                                          |                                                         |                    |
| Paraffinic hydrocarbons      |                                                         |                                                 |                                                                                   |                                                                                     |                                                                                    |                                                                                     |                                                                                     |                                                                                         |                                                                                                |                             |                                                                 |                                              |                                                         |                                                   |                                                                   |                                                                                                                                                                                     |                                                                                        |                                                                                         |                                                         |                                                          |                                                         |                    |
| Concentrated phosphoric acid |                                                         |                                                 |                                                                                   |                                                                                     |                                                                                    |                                                                                     |                                                                                     |                                                                                         |                                                                                                |                             |                                                                 |                                              |                                                         |                                                   |                                                                   |                                                                                                                                                                                     |                                                                                        |                                                                                         |                                                         |                                                          |                                                         |                    |
| Methyl iodide                |                                                         |                                                 |                                                                                   |                                                                                     |                                                                                    |                                                                                     |                                                                                     |                                                                                         |                                                                                                |                             |                                                                 |                                              |                                                         |                                                   |                                                                   |                                                                                                                                                                                     |                                                                                        |                                                                                         |                                                         |                                                          |                                                         |                    |
| 1-Butanol                    |                                                         |                                                 |                                                                                   |                                                                                     |                                                                                    |                                                                                     |                                                                                     |                                                                                         |                                                                                                |                             |                                                                 |                                              |                                                         |                                                   |                                                                   |                                                                                                                                                                                     |                                                                                        |                                                                                         |                                                         |                                                          |                                                         |                    |
| n-Propyl bromide             |                                                         |                                                 |                                                                                   |                                                                                     |                                                                                    |                                                                                     |                                                                                     |                                                                                         |                                                                                                |                             |                                                                 |                                              |                                                         |                                                   |                                                                   |                                                                                                                                                                                     |                                                                                        |                                                                                         |                                                         |                                                          |                                                         |                    |
| Ethyl silicate               |                                                         |                                                 |                                                                                   |                                                                                     |                                                                                    |                                                                                     |                                                                                     |                                                                                         |                                                                                                |                             |                                                                 |                                              |                                                         |                                                   |                                                                   |                                                                                                                                                                                     |                                                                                        |                                                                                         |                                                         |                                                          |                                                         |                    |
| Butyraldehyde                |                                                         |                                                 |                                                                                   |                                                                                     |                                                                                    |                                                                                     |                                                                                     |                                                                                         |                                                                                                |                             |                                                                 |                                              |                                                         |                                                   |                                                                   |                                                                                                                                                                                     |                                                                                        |                                                                                         |                                                         |                                                          |                                                         |                    |
| Acetic anhydride             |                                                         |                                                 |                                                                                   |                                                                                     |                                                                                    |                                                                                     |                                                                                     |                                                                                         |                                                                                                |                             |                                                                 |                                              |                                                         |                                                   |                                                                   |                                                                                                                                                                                     |                                                                                        |                                                                                         |                                                         |                                                          |                                                         |                    |
| Acetic acid                  |                                                         |                                                 |                                                                                   |                                                                                     |                                                                                    |                                                                                     |                                                                                     |                                                                                         |                                                                                                |                             |                                                                 |                                              |                                                         |                                                   |                                                                   |                                                                                                                                                                                     |                                                                                        |                                                                                         |                                                         |                                                          |                                                         |                    |
| Triethyl borate              |                                                         |                                                 |                                                                                   |                                                                                     |                                                                                    |                                                                                     |                                                                                     |                                                                                         |                                                                                                |                             |                                                                 |                                              |                                                         |                                                   |                                                                   |                                                                                                                                                                                     |                                                                                        |                                                                                         |                                                         |                                                          |                                                         |                    |
| Caprylic acid                |                                                         |                                                 |                                                                                   |                                                                                     |                                                                                    |                                                                                     |                                                                                     |                                                                                         |                                                                                                |                             |                                                                 |                                              |                                                         |                                                   |                                                                   |                                                                                                                                                                                     |                                                                                        |                                                                                         |                                                         |                                                          |                                                         |                    |

Notes: <sup>a</sup> 25°C, <sup>b</sup> in DMSO-d6, <sup>c</sup> acidic, <sup>d</sup> hot, <sup>e</sup> shock sensitive, <sup>f</sup> warm







| NaB <sub>10</sub> H <sub>13</sub> CN·(CH <sub>3</sub> ) <sub>2</sub> S | B <sub>12</sub> H <sub>10</sub> (O <sub>2</sub> SC <sub>4</sub> H <sub>8</sub> ) <sub>2</sub> | [(CH <sub>3</sub> ) <sub>4</sub> N] <sub>2</sub> B <sub>3</sub> Cl <sub>6</sub> H | [(C <sub>2</sub> H <sub>5</sub> ) <sub>4</sub> N] <sub>2</sub> B <sub>3</sub> Cl <sub>6</sub> H | 1.10-B <sub>10</sub> H <sub>8</sub> (N <sub>2</sub> ) <sub>2</sub> | (C <sub>6</sub> H <sub>11</sub> ) <sub>2</sub> B <sub>10</sub> H <sub>4</sub> (CO) <sub>2</sub> (biscyclohexylated salt) | BaB <sub>12</sub> H <sub>11</sub> ·COOH·H <sub>2</sub> O | (C <sub>2</sub> H <sub>5</sub> Hg) <sub>2</sub> -1,10-B <sub>10</sub> Cl <sub>6</sub> (COC <sub>2</sub> H <sub>5</sub> ) <sub>2</sub> | TBAB <sub>3</sub> H <sub>8</sub> | LiB <sub>3</sub> H <sub>8</sub> | KB <sub>3</sub> H <sub>8</sub> | TBAB <sub>3</sub> H <sub>9</sub> | KB <sub>3</sub> H <sub>9</sub> | B <sub>10</sub> H <sub>14</sub> | Na <sub>2</sub> B <sub>3</sub> H <sub>6</sub> | B <sub>3</sub> H <sub>8</sub> | KB <sub>3</sub> H <sub>8</sub> | CsB <sub>3</sub> H <sub>8</sub> | TMAB <sub>3</sub> H <sub>8</sub> | TEAB <sub>3</sub> H <sub>8</sub> | Ag <sub>2</sub> B <sub>10</sub> Cl <sub>10</sub> |
|------------------------------------------------------------------------|-----------------------------------------------------------------------------------------------|-----------------------------------------------------------------------------------|-------------------------------------------------------------------------------------------------|--------------------------------------------------------------------|--------------------------------------------------------------------------------------------------------------------------|----------------------------------------------------------|---------------------------------------------------------------------------------------------------------------------------------------|----------------------------------|---------------------------------|--------------------------------|----------------------------------|--------------------------------|---------------------------------|-----------------------------------------------|-------------------------------|--------------------------------|---------------------------------|----------------------------------|----------------------------------|--------------------------------------------------|
|                                                                        | insol. <sup>70</sup>                                                                          |                                                                                   |                                                                                                 | insol. <sup>71</sup>                                               | insol. <sup>72</sup>                                                                                                     | vs. <sup>72</sup>                                        | insol. <sup>72</sup>                                                                                                                  |                                  |                                 |                                |                                  |                                |                                 |                                               |                               |                                | sol. <sup>75</sup>              |                                  | sol. <sup>75</sup>               | vs. <sup>20</sup>                                |
|                                                                        | insol. <sup>70</sup>                                                                          |                                                                                   |                                                                                                 |                                                                    |                                                                                                                          |                                                          |                                                                                                                                       |                                  |                                 |                                |                                  |                                |                                 |                                               |                               |                                |                                 | sol. <sup>75</sup>               | sol. <sup>75</sup>               | vs. <sup>20</sup>                                |
|                                                                        | insol. <sup>70</sup>                                                                          |                                                                                   |                                                                                                 |                                                                    |                                                                                                                          |                                                          |                                                                                                                                       |                                  |                                 |                                |                                  |                                |                                 |                                               |                               |                                |                                 |                                  |                                  | vs. <sup>20</sup>                                |
|                                                                        |                                                                                               | insol. <sup>60</sup>                                                              |                                                                                                 |                                                                    |                                                                                                                          |                                                          |                                                                                                                                       | sol. <sup>73</sup>               |                                 | sol. <sup>73</sup>             | sol. <sup>74</sup>               | sol. <sup>74</sup>             |                                 |                                               |                               |                                |                                 |                                  |                                  | vs. <sup>20</sup>                                |
|                                                                        |                                                                                               |                                                                                   |                                                                                                 |                                                                    |                                                                                                                          |                                                          |                                                                                                                                       |                                  |                                 |                                |                                  |                                |                                 |                                               |                               |                                |                                 |                                  |                                  | vs. <sup>20</sup>                                |
|                                                                        | insol. <sup>70</sup>                                                                          |                                                                                   |                                                                                                 |                                                                    |                                                                                                                          |                                                          |                                                                                                                                       |                                  |                                 |                                |                                  |                                |                                 |                                               |                               |                                |                                 |                                  |                                  | vs. <sup>20</sup>                                |
|                                                                        | insol. <sup>70</sup>                                                                          |                                                                                   |                                                                                                 |                                                                    |                                                                                                                          |                                                          |                                                                                                                                       |                                  |                                 |                                |                                  |                                |                                 |                                               |                               |                                |                                 |                                  |                                  | vs. <sup>20</sup>                                |
|                                                                        | insol. <sup>70</sup>                                                                          |                                                                                   |                                                                                                 |                                                                    |                                                                                                                          |                                                          |                                                                                                                                       |                                  |                                 |                                |                                  |                                |                                 |                                               |                               |                                |                                 |                                  |                                  | vs. <sup>20</sup>                                |
|                                                                        | insol. <sup>70</sup>                                                                          |                                                                                   |                                                                                                 |                                                                    |                                                                                                                          |                                                          |                                                                                                                                       |                                  |                                 |                                |                                  |                                |                                 |                                               |                               |                                |                                 |                                  |                                  | vs. <sup>20</sup>                                |
|                                                                        |                                                                                               |                                                                                   |                                                                                                 |                                                                    |                                                                                                                          |                                                          |                                                                                                                                       |                                  |                                 |                                |                                  |                                |                                 |                                               | insol. <sup>33</sup>          | sol. <sup>31</sup>             |                                 |                                  |                                  |                                                  |
|                                                                        |                                                                                               |                                                                                   |                                                                                                 |                                                                    |                                                                                                                          |                                                          |                                                                                                                                       |                                  |                                 |                                |                                  |                                |                                 |                                               |                               |                                |                                 |                                  |                                  |                                                  |
|                                                                        |                                                                                               | sol. <sup>60</sup>                                                                | vs. <sup>60</sup>                                                                               |                                                                    |                                                                                                                          |                                                          |                                                                                                                                       |                                  |                                 |                                |                                  |                                |                                 |                                               |                               |                                |                                 |                                  | sol. <sup>75</sup>               |                                                  |
|                                                                        |                                                                                               | insol. <sup>60</sup>                                                              |                                                                                                 |                                                                    |                                                                                                                          |                                                          |                                                                                                                                       |                                  |                                 |                                |                                  |                                |                                 |                                               |                               |                                |                                 |                                  | insol. <sup>76</sup>             |                                                  |
|                                                                        |                                                                                               |                                                                                   |                                                                                                 |                                                                    |                                                                                                                          |                                                          |                                                                                                                                       |                                  |                                 |                                |                                  |                                |                                 |                                               |                               |                                |                                 |                                  |                                  | vs. <sup>20</sup>                                |
|                                                                        |                                                                                               |                                                                                   |                                                                                                 |                                                                    |                                                                                                                          |                                                          |                                                                                                                                       |                                  |                                 |                                |                                  |                                | 50 wt.% <sup>4</sup>            |                                               |                               |                                |                                 |                                  |                                  |                                                  |
|                                                                        |                                                                                               |                                                                                   |                                                                                                 |                                                                    |                                                                                                                          |                                                          |                                                                                                                                       |                                  | sol. <sup>58</sup>              |                                |                                  |                                |                                 |                                               |                               |                                |                                 |                                  |                                  |                                                  |
|                                                                        |                                                                                               | insol. <sup>60</sup>                                                              | insol. <sup>60</sup>                                                                            |                                                                    |                                                                                                                          |                                                          |                                                                                                                                       | sol. <sup>73</sup>               |                                 | insol. <sup>73</sup>           | sol. <sup>74</sup>               | insol. <sup>74</sup>           |                                 |                                               |                               |                                |                                 |                                  |                                  |                                                  |
|                                                                        |                                                                                               |                                                                                   |                                                                                                 |                                                                    |                                                                                                                          |                                                          |                                                                                                                                       |                                  |                                 |                                |                                  |                                |                                 |                                               |                               |                                |                                 |                                  |                                  | 20 wt.% <sup>4</sup>                             |
| insol. <sup>69</sup>                                                   |                                                                                               |                                                                                   |                                                                                                 | sol. <sup>71</sup>                                                 |                                                                                                                          |                                                          |                                                                                                                                       |                                  |                                 |                                |                                  |                                |                                 |                                               |                               |                                |                                 |                                  |                                  | 20 wt.% <sup>4</sup>                             |
|                                                                        |                                                                                               | insol. <sup>60</sup>                                                              | insol. <sup>60</sup>                                                                            |                                                                    |                                                                                                                          |                                                          |                                                                                                                                       | sol. <sup>73</sup>               |                                 | insol. <sup>73</sup>           | sol. <sup>74</sup>               | insol. <sup>74</sup>           |                                 |                                               |                               |                                |                                 |                                  |                                  |                                                  |
|                                                                        |                                                                                               |                                                                                   |                                                                                                 |                                                                    |                                                                                                                          |                                                          |                                                                                                                                       |                                  |                                 |                                |                                  |                                |                                 |                                               |                               |                                |                                 |                                  |                                  |                                                  |
|                                                                        |                                                                                               |                                                                                   |                                                                                                 |                                                                    |                                                                                                                          |                                                          |                                                                                                                                       |                                  |                                 |                                |                                  |                                |                                 |                                               |                               |                                |                                 |                                  |                                  |                                                  |
|                                                                        | insol. <sup>70</sup>                                                                          |                                                                                   |                                                                                                 |                                                                    |                                                                                                                          |                                                          |                                                                                                                                       |                                  |                                 |                                |                                  |                                |                                 |                                               |                               |                                |                                 |                                  |                                  |                                                  |
|                                                                        |                                                                                               |                                                                                   |                                                                                                 |                                                                    |                                                                                                                          |                                                          |                                                                                                                                       |                                  |                                 |                                |                                  |                                |                                 |                                               |                               |                                |                                 |                                  |                                  |                                                  |
|                                                                        |                                                                                               |                                                                                   |                                                                                                 |                                                                    |                                                                                                                          |                                                          |                                                                                                                                       |                                  |                                 |                                |                                  |                                |                                 |                                               |                               |                                |                                 |                                  |                                  | 4 - 5 wt.% <sup>4</sup>                          |
|                                                                        |                                                                                               |                                                                                   |                                                                                                 |                                                                    |                                                                                                                          |                                                          |                                                                                                                                       |                                  |                                 |                                |                                  |                                |                                 |                                               |                               |                                |                                 |                                  |                                  |                                                  |
|                                                                        |                                                                                               |                                                                                   |                                                                                                 |                                                                    |                                                                                                                          |                                                          |                                                                                                                                       |                                  |                                 |                                |                                  |                                |                                 |                                               |                               |                                |                                 |                                  |                                  |                                                  |
|                                                                        |                                                                                               |                                                                                   |                                                                                                 |                                                                    |                                                                                                                          |                                                          |                                                                                                                                       | sol. <sup>73</sup>               |                                 | sol. <sup>74</sup>             | sol. <sup>74</sup>               | sol. <sup>74</sup>             |                                 |                                               |                               |                                |                                 |                                  |                                  |                                                  |
|                                                                        |                                                                                               |                                                                                   |                                                                                                 |                                                                    |                                                                                                                          |                                                          |                                                                                                                                       |                                  |                                 |                                |                                  |                                |                                 |                                               |                               |                                |                                 |                                  |                                  |                                                  |
|                                                                        |                                                                                               |                                                                                   |                                                                                                 |                                                                    |                                                                                                                          |                                                          |                                                                                                                                       |                                  |                                 |                                |                                  |                                |                                 |                                               |                               |                                |                                 |                                  |                                  | 10 wt.% <sup>4</sup>                             |
| insol. <sup>70</sup>                                                   |                                                                                               | sol. <sup>60</sup>                                                                |                                                                                                 |                                                                    |                                                                                                                          |                                                          |                                                                                                                                       |                                  |                                 |                                |                                  |                                |                                 |                                               |                               |                                |                                 |                                  |                                  |                                                  |
|                                                                        |                                                                                               |                                                                                   |                                                                                                 |                                                                    |                                                                                                                          |                                                          |                                                                                                                                       |                                  |                                 |                                |                                  |                                |                                 |                                               |                               |                                |                                 |                                  |                                  |                                                  |
|                                                                        |                                                                                               | insol. <sup>60</sup>                                                              |                                                                                                 |                                                                    |                                                                                                                          |                                                          |                                                                                                                                       |                                  |                                 |                                |                                  |                                |                                 |                                               |                               |                                |                                 |                                  |                                  |                                                  |
|                                                                        |                                                                                               | insol. <sup>60</sup>                                                              |                                                                                                 |                                                                    |                                                                                                                          |                                                          |                                                                                                                                       |                                  |                                 |                                |                                  |                                |                                 |                                               |                               |                                |                                 |                                  |                                  |                                                  |
|                                                                        |                                                                                               |                                                                                   |                                                                                                 |                                                                    |                                                                                                                          |                                                          |                                                                                                                                       |                                  |                                 |                                |                                  |                                |                                 |                                               |                               |                                |                                 |                                  |                                  | 20 wt.% <sup>4</sup>                             |
|                                                                        |                                                                                               |                                                                                   |                                                                                                 |                                                                    |                                                                                                                          |                                                          |                                                                                                                                       |                                  |                                 |                                |                                  |                                |                                 |                                               |                               |                                |                                 |                                  |                                  | 20 wt.% <sup>4</sup>                             |
|                                                                        |                                                                                               |                                                                                   |                                                                                                 |                                                                    |                                                                                                                          |                                                          |                                                                                                                                       |                                  |                                 |                                |                                  |                                |                                 |                                               |                               |                                |                                 |                                  |                                  | 20 wt.% <sup>4</sup>                             |
|                                                                        |                                                                                               |                                                                                   |                                                                                                 |                                                                    |                                                                                                                          |                                                          |                                                                                                                                       |                                  |                                 |                                |                                  |                                |                                 |                                               |                               |                                |                                 |                                  |                                  | 20 wt.% <sup>4</sup>                             |
|                                                                        |                                                                                               |                                                                                   |                                                                                                 |                                                                    |                                                                                                                          |                                                          |                                                                                                                                       |                                  |                                 |                                |                                  |                                |                                 |                                               |                               |                                |                                 |                                  |                                  | 10 - 20 wt.% <sup>4</sup>                        |
|                                                                        |                                                                                               |                                                                                   |                                                                                                 |                                                                    |                                                                                                                          |                                                          |                                                                                                                                       |                                  |                                 |                                |                                  |                                |                                 |                                               |                               |                                |                                 |                                  |                                  | 10 wt.% <sup>4</sup>                             |
|                                                                        |                                                                                               |                                                                                   |                                                                                                 |                                                                    |                                                                                                                          |                                                          |                                                                                                                                       |                                  |                                 |                                |                                  |                                |                                 |                                               |                               |                                |                                 |                                  |                                  | 2 - 10 wt.% <sup>4</sup>                         |
|                                                                        |                                                                                               |                                                                                   |                                                                                                 |                                                                    |                                                                                                                          |                                                          |                                                                                                                                       |                                  |                                 |                                |                                  |                                |                                 |                                               |                               |                                |                                 |                                  |                                  | 2 wt.% <sup>4</sup>                              |

## Dielectric constants of solvents

| Solvents                   | Dielectric constants |
|----------------------------|----------------------|
| Water                      | 78.5                 |
| Methanol                   | 32.6                 |
| Ethanol                    | 24.6                 |
| THF                        | 7.5                  |
| Ammonia                    | 16.6                 |
| Methylamine                | 16.7                 |
| Ethylamine                 | 8.7                  |
| Diethylamine               | 3.7                  |
| Triethylamine              | 2.4                  |
| Trimethylamine             | 2.9                  |
| TMEDA                      | 2                    |
| Ethylenediamine            | 16.1                 |
| n-Propyl amine             | 5.1                  |
| Isopropyl amine            | 5.6                  |
| t-Butyl amine              | 4.3                  |
| n-Butyl amine              | 4.7                  |
| Cyclohexylamine            | 4.7                  |
| Morpholine                 | 7.3                  |
| Aniline                    | 7.1                  |
| Pyridine                   | 12.3                 |
| Ethanolamine               | 31.9                 |
| 2-Propanol                 | 19.9                 |
| t-Butanol                  | 12.5                 |
| 2-Ethylhexanol             | 7.7                  |
| Tetrahydrofurfuryl alcohol | 2.1                  |
| Monoglyme                  | 7.3                  |
| Diglyme                    | 7.2                  |
| Triglyme                   | 7.5                  |
| Tetraglyme                 | 12                   |
| DMF                        | 38.2                 |
| Dimethylacetamide          | 37.8                 |
| DMSO                       | 47                   |
| Acetonitrile               | 36.6                 |
| 1,4-Dioxane                | 2.2                  |
| 2-Ethoxyethanol            | 29.6                 |
| 1,2-Diethoxyethane         | 3.9                  |
| Ethyl acetate              | 6                    |
| Diethyl ether              | 4.3                  |
| Dimethyl ether             | 5                    |
| Trimethyl borate           | 2.3                  |
| Chloroform                 | 4.8                  |
| Carbon disulfide           | 2.6                  |
| o-Bismethoxybenzene        | 4.3                  |
| Benzene                    | 2.3                  |
| Dimethylsulfide            | 6.3                  |
| Dichloromethane            | 9.1                  |
| Dichloroethane             | 10.4                 |
| Hydrazine                  | 51.7                 |

|                              |      |
|------------------------------|------|
| Hexane                       | 1.9  |
| Acetone                      | 21   |
| Glycerol                     | 46.5 |
| Propylene carbonate          | 64.4 |
| EC-DMC                       | 31.4 |
| BMIM-TFSI                    | 14   |
| Methylene chloride           | 8.9  |
| 2-Butanol                    | 17.3 |
| 2-Butanone                   | 18.6 |
| Toluene                      | 2.4  |
| Cyclohexane                  | 2    |
| Pentane                      | 1.8  |
| Thionyl chloride             | 9.3  |
| DME/1,3-dioxolane mixture    | 7.3  |
| DME                          | 7.2  |
| 1,3- dioxolane               | 19   |
| RNH <sub>2</sub>             |      |
| Carbon tetrachloride         | 2.2  |
| Alcohols                     |      |
| Paraffinic hydrocarbons      |      |
| Concentrated phosphoric acid |      |
| Methyl iodide                | 7.1  |
| Common organic solvents      |      |
| Anisole                      | 4.3  |
| 1-Butanol                    | 17.8 |
| n-Propyl bromide             | 7.2  |
| Ethyl silicate               | 2.5  |
| Butyraldehyde                | 13.4 |
| Acetic anhydride             | 22   |
| Acetic acid                  | 6.2  |
| Triethyl borate              | 2.2  |
| Caprylic acid                | 2.5  |
| n-Heptane                    | 1.9  |
| Piperidine                   | 5.9  |
| Benzylamine                  | 4.6  |

## Abbreviations

| Abbrivation | Meaning                                                       |
|-------------|---------------------------------------------------------------|
| sol.        | soluble                                                       |
| insol.      | insoluble                                                     |
| vs.         | very soluble                                                  |
| sl.         | slightly soluble                                              |
| reac.       | reacts with                                                   |
| THF         | tetrahydrofuran                                               |
| TMEDA       | tetramethylethylenediamine                                    |
| DMF         | dimethylformamide                                             |
| DMSO        | dimethyl sulfoxide                                            |
| EC-DMC      | ethylene carbonate : dimethyl carbonate (1 : 1 vol.%)         |
| BMIM-TFSI   | 1-butyl-3-methylimidazolium bis(trifluoromethylsulfonyl)imide |
| DME         | 1,2-dimethoxyethane                                           |
| TEA         | tetraethylamine                                               |
| TBA         | tetrabutylamine                                               |
| TMA         | tetramethylamine                                              |
| COD         | cycloocta-1,5-diene (C <sub>8</sub> H <sub>12</sub> )         |
| 9-BBN       | 9-bora[3.3.1]bicyclononane (BC <sub>8</sub> H <sub>14</sub> ) |
| hex         | hexane                                                        |

## References

1. D. R. Lide, *CRC Handbook of Chemistry and Physics, 88th Edition*, Taylor & Francis, 2007.
2. H. C. Brown, Y. M. Choi and S. Narasimhan, *Inorg. Chem.*, 1982, **21**, 3657.
3. B. D. James and M. G. H. Wallbridge, in *Progress in Inorganic Chemistry*, 1970, DOI: <https://doi.org/10.1002/9780470166123.ch3>, pp. 99.
4. R. M. Adams, *Boron, metallo-boron compounds and boranes*, Interscience Publishers New York, 1964.
5. H. Noth and B. Wrackmeyer, *Nuclear Magnetic Resonance Spectroscopy of Boron Compounds*, Springer Science & Business Media, 1978.
6. B. Richter, J. B. Grinderslev, K. T. Møller, M. Paskevicius and T. R. Jensen, *Inorg. Chem.*, 2018, **57**, 10768.
7. C. R. Cloutier, University of British Columbia, 2006.
8. H. Hagemann and R. Černý, *Dalton Trans.*, 2010, **39**, 6006.
9. Yamamoto J. Sodium borohydride digest. *Rohm, H, Ed.* 2003.
10. H. Schlesinger, H. C. Brown and A. Finholt, *J. Am. Chem. Soc.*, 1953, **75**, 205.
11. K. Chlopek, C. Frommen, A. Léon, O. Zabara and M. Fichtner, *J. Mater. Chem.*, 2007, **17**, 3496.
12. M. Bremer, H. Nöth and M. Warchhold, *Eur. J. Inorg. Chem.*, 2003, **2003**, 111.
13. M. D. Banus, R. W. Bragdon and T. R. Gibb Jr, *J. Am. Chem. Soc.*, 1952, **74**, 2346.
14. L. V. Titov and L. A. Gavrilova, *Russ. J. Inorg. Chem.* 1970, **15**, 1509
15. D. J. Raber, W. C. Guida and D. C. Shoenberger, *Tetrahedron Lett.*, 1981, **22**, 5107.
16. T. D. Humphries, M. B. Ley, C. Frommen, K. T. Munroe, T. R. Jensen and B. C. Hauback, *J. Mater. Chem. A*, 2015, **3**, 691.
17. R. R. Rietz, A. Zalkin, D. H. Templeton, N. M. Edelstein and L. K. Templeton, *Inorg. Chem.*, 1978, **17**, 653.
18. A. Blake, Master of Science Electronic theses & dissertation, Pittsburg State University 2015.
19. E. Muettterties, J. Balthis, Y. Chia, W. Knoth and H. Miller, *Inorg. Chem.*, 1964, **3**, 444.
20. W. H. Knoth, H. Miller, J. C. Sauer, J. Balthis, Y. Chia and E. Muettterties, *Inorg. Chem.*, 1964, **3**, 159.
21. A. Garcia, G. Müller, R. Černý, D. Rentsch, R. Asakura, C. Battaglia and A. Remhof, *J. Mater. Chem. A*, 2023, **11**, 18996.
22. V. V. Avdeeva, I. N. Polyakova, L. V. Goeva, G. A. Buzanov, E. A. Malinina and N. T. Kuznetsov, *Inorg. Chim. Acta*, 2016, **451**, 129.
23. L. I. Zakharkin, V. V. Guseva and P. V. Petrovskii, *Russ. J. Gen. Chem.*, 2001, **71**, 1017.
24. A. Gigante, L. Duchêne, R. Moury, M. Pupier, A. Remhof and H. Hagemann, *ChemSusChem*, 2019, **12**, 4832.
25. R. Moury, A. Gigante and H. Hagemann, *Int. J. Hydrogen Energy*, 2017, **42**, 22417.
26. X. Zheng, Y. Yang, F. Zhao, F. Fang and Y. Guo, *Chem. Commun.*, 2017, **53**, 11083.
27. M.-C. Bay, R. Grissa, K. V. Egorov, R. Asakura and C. Battaglia, *Mater. Futures*, 2022, **1**, 031001.
28. H. Miller, N. Miller and E. Muettterties, *Inorg. Chem.*, 1964, **3**, 1456.
29. V. Mustyatsa, N. Votina, I. Dudenkov, K. Solntsev and N. Kuznetsov, *Russ. J. Coord. Chem.*, 1998, **24**, 847.
30. M. M. Green, California State University, Northridge, 2023.
31. J. Wang, T. Steenhaut, H.-W. Li and Y. Filinchuk, *Inorg. Chem.*, 2023, **62**, 2153.
32. D. V. Peryshkov, A. A. Popov and S. H. Strauss, *J. Am. Chem. Soc.*, 2009, **131**, 18393.
33. X. Mu, J. C. Axtell, N. A. Bernier, K. O. Kirlikovali, D. Jung, A. Umancor, K. Qian, X. Chen, K. L. Bay and M. Kirolos, *Chem*, 2019, **5**, 2461.
34. V. Aftandilian, H. Miller, G. Parshall and E. Muettterties, *Inorg. Chem.*, 1962, **1**, 734.
35. S. Payandeh, D. Rentsch, Z. Łodziana, R. Asakura, L. Bigler, R. Černý, C. Battaglia and A. Remhof, *Adv. Funct. Mater.*, 2021, **31**, 2010046.
36. D. H. P. Souza, A. M. D'Angelo, T. D. Humphries, C. E. Buckley and M. Paskevicius, *Dalton Trans.*, 2022, **51**, 13848.
37. G. B. Dunks, K. Barker, E. Hedaya, C. Hefner and P. Remeč, *Inorg. Chem.*, 1981, **20**, 1692.
38. L. V. Titov and P. V. Petrovskii, *Russ. J. Inorg. Chem.*, 2011, **56**, 1032.
39. L. V. Titov, L. A. Gavrilova and P. V. Petrovskii, *Russ. J. Inorg. Chem.*, 2008, **53**, 565.
40. G. B. Dunks and K. P. Ordonez, *Inorg. Chem.*, 1978, **17**, 1514.
41. T. Peymann, C. B. Knobler, S. I. Khan and M. F. Hawthorne, *J. Am. Chem. Soc.*, 2001, **123**, 2182.
42. W. Hertler and M. Raasch, *J. Am. Chem. Soc.*, 1964, **86**, 3661.
43. V. V. Avdeeva, E. A. Malinina, A. V. Churakov, I. N. Polyakova and N. T. Kuznetsov, *Polyhedron*, 2019, **169**, 144.
44. S. Liu, X. Wang and G.-X. Jin, *J. Organomet. Chem.*, 2006, **691**, 261.
45. S. Cai, X. Hou, L.-H. Weng and G.-X. Jin, *J. Organomet. Chem.*, 2005, **690**, 910.
46. B. Chamberland and E. Muettterties, *Inorg. Chem.*, 1964, **3**, 1450.
47. S. G. Shore and O. S. U. R. F. COLUMBUS, *Studies on Syntheses and Derivatives of Boron Hydride Systems*, 1988.
48. H. Beall and D. F. Gaines, *Inorg. Chim. Acta*, 1999, **289**, 1.
49. A. Berger, C. E. Buckley and M. Paskevicius, *Inorg. Chem.*, 2021, **60**, 14744.
50. O. Volkov, W. Dirk, U. Englert and P. Paetzold, *Z. anorg. allg. Chem.*, 1999, **625**, 1193.
51. A. N. Bridges, J. Liu, R. G. Kultyshev, D. F. Gaines and S. G. Shore, *Inorg. Chem.*, 1998, **37**, 3276.
52. E. V. Bukovsky, Colorado State University, 2015.
53. S. Pylypko, S. Ould-Amara, A. Zadick, E. Petit, M. Chatenet, M. Cretin and U. B. Demirci, *Appl. Catal., B*, 2018, **222**, 1.
54. A. C. Dunbar, J. A. Macor and G. S. Girolami, *Inorg. Chem.*, 2014, **53**, 822.
55. J. W. Johnson and J. F. Brody, *J. Electrochem. Soc.*, 1982, **129**, 2213.
56. N. S. Hosmane, J. R. Wermer, Z. Hong, T. D. Getman and S. G. Shore, *Inorg. Chem.*, 1987, **26**, 3638.
57. S. H. Lawrence, J. R. Wermer, S. K. Boocock, M. A. Banks, P. C. Keller and S. G. Shore, *Inorg. Chem.*, 1986, **25**, 367.
58. D. F. Gaines and T. V. Iorns, *J. Am. Chem. Soc.*, 1967, **89**, 3375.
59. A. Y. Bykov, A. P. Zhdanov, K. Y. Zhizhin and N. T. Kuznetsov, *Russ. J. Inorg. Chem.*, 2016, **61**, 1629.
60. J. Forstner, T. Haas and E. Muettterties, *Inorg. Chem.*, 1964, **3**, 155.
61. N. Kuznetsov, L. Kulikova and S. Zhukov, *Zh. Neorg. Khim. (USSR)*, 1976, **21**, 96.
62. W. Preetz and G. Peters, *Eur. J. Inorg. Chem.*, 1999, **1999**, 1831.
63. F. Klanberg, D. R. Eaton, L. J. Guggenberger and E. L. Muettterties, *Inorg. Chem.*, 1967, **6**, 1271.
64. E. Muettterties, R. Wiersema and M. Hawthorne, *J. Am. Chem. Soc.*, 1973, **95**, 7520.
65. F. Klanberg and E. Muettterties, *Inorg. Chem.*, 1966, **5**, 1955.
66. M. J. Bayer and M. F. Hawthorne, *Inorg. Chem.*, 2004, **43**, 2018.

67. W. R. Hertler, F. Klanberg and E. L. Muetterties, *Inorg. Chem.* , 1967, **6**, 1696.
68. N. Miller, J. Forstner and E. Muetterties, *Inorg. Chem.* , 1964, **3**, 1690.
69. W. H. Knoth and E. L. Muetterties, *J. Inorg. Nucl. Chem.* , 1961, **20**, 66.
70. H. Miller, W. Hertler, E. Muetterties, W. Knoth and N. Miller, *Inorg. Chem.* , 1965, **4**, 1216.
71. W. Knoth, *J. Am. Chem. Soc.* , 1966, **88**, 935.
72. W. H. Knoth, J. C. Sauer, J. H. Balthis, H. C. Miller and E. L. Muetterties, *J. Am. Chem. Soc.* , 1967, **89**, 4842.
73. M. A. Nelson and G. Kodama, *Inorg. Chem.* , 1981, **20**, 3579.
74. V. Brice, H. Johnson, D. Denton and S. G. Shore, *Inorg. Chem.* , 1972, **11**, 1135.
75. J. M. Makhlof, W. V. Hough and G. T. Hefferan, *Inorg. Chem.* , 1967, **6**, 1196.
76. X. Chen, X.-R. Liu, X. Wang, X.-M. Chen, Y. Jing and D. Wei, *Dalton Trans.*, 2021, **50**, 13676.
