# Supplementary material for: Solubility of metal–boron–hydrogen compounds
Source: Royal Society of Chemistry journal article supplement (doi:10.1039/d4dt02256d), 2024-11-25
Supplement: d4dt02256d2.xlsx [file d4dt02256d2.xlsx]

## Sheet: Header
Electronic Supplementary Information for:
Solubility of metal-boron-hydrogen compounds
Thi Phuong Thao Nguyen,a Terry D. Humphries,a Hans Hagemann,b Craig E. Buckley,a Torben R. Jensen,c Mark Paskevicius a*
a. Department of Physics and Astronomy, Institute for Energy Transition, Curtin University, GPO Box U1987, Perth, WA 6845, Australia.
E-mail: m.paskevicius@curtin.edu.au
b. Département de Chimie Physique, Université de Genève, 30, quai E. Ansermet, CH-1211 Geneva 4, Switzerland..
c. Department of Chemistry, Interdisciplinary Nanoscience Center (iNANO), Aarhus University, Langelandsgade 140, DK-8000 Aarhus, Denmark.

## Sheet: BH4(-)
Solvent	Compound
	LiBH4	NaBH4	KBH4	CsBH4	RbBH4	Mg(BH4)2	Ca(BH4)2	Sr(BH4)2	Ba(BH4)2	TMABH4	TBABH4	TEABH4	Y(BH4)3	Nd(BH4)3	Sm(BH4)2	Sm(BH4)3	Gd(BH4)3	Yb(BH4)2	Yb(BH4)3	Eu(BH4)2	U(BH4)4
Water	sol.a 1	55 wt.%b 4	19 wt.%b 4	vs.b 8	vs.b 8	reac.	sol.b 8	sol.b 8		48 wt.%13	sol.5	reac.13,14
	reac.*		reac.*
Methanol	reac.	reac. (16.4 wt.%)4	0.7 wt.% (20°C)4	14.2 wt.%b 8	6.1 wt.%b 8	reac.				reac.13		reac.13,14
			0.56 wt.%b 8
Ethanol	sol.1	reac. (4.0 wt.%)4	0.25 wt.%b 8			reac.				0.5 wt.%b 13	sol.14	reac.13
THF	11.43 Mb 2	0.1 wt.%4	insol.b 8			sol.6	1690 mmol/L6	40 mmol/L6	insol.6	insol.4,13	sol.5	insol.14	40 mmol/L6	35 mmol/L6	40 mmol/L6	< 25 mmol/L6	40 mmol/L6	25 mmol/L6	60 mmol/L6
	21 - 28 wt.%3
	15.5 g/100 g (-23°C)4
	24.3 g/100 g (35°C)4
Ammonia	48 wt.% (RT)4	104 wt.%b 4	20 wt.%b 4									sol.14
Methylamine		27.6 wt.% (-22°C)9
Ethylamine		20.9 wt.% (17°C)9
Diethylamine		< 1 wt.%10
Triethylamine	sol.5	< 1 wt.%10				insol.11
Trimethylamine						insol.11
TMEDA						sol.11
Ethylenediamine		22 wt.% (75°C)4	3.9 wt.% (75°C)4							insol.4
n-Propyl amine		9.7 wt.%4
Isopropyl amine	1270 mmol/L6	6.0 wt.%4	insol.b 8			sol.12				insol.4,13	sol.14	sol.14
	3 - 4 g/Lb 4	1100 mmol/L
t-Butyl amine						sol.12
n-Butyl amine		4.9 wt.%4
Cyclohexylamine		1.8 wt.%
Morpholine		1.4 wt.%b 4
Aniline		0.6 wt.%
Pyridine		3.1 wt.%b 4				sol.12				insol.13
Ethanolamine		7.7 wt.%
2-Propanol		0.25 wt.%4										sol.14
		0.37 wt.%b 9
t-Butanol		0.11 wt.%b 9
2-Ethylhexanol		0.01 wt.%b 9
Tetrahydrofurfuryl alcohol		reac. (14.0 wt.%)4
Monoglyme	4700 mmol/L6	2.6 wt.% (0°C)4	insol.4				0.13 wt.%b 8
		0.8 wt.% (20°C)9
Diglyme	9.92 wt.%7	5.5 wt.%b 4	insol. (0.013 wt%)4				450 mmol/L6				sol.5
	4250 mmol/L6						2.05 wt.%b 8
Triglyme		8.7 wt.%b 4	0.1 wt.% (0°C)4				0.2 wt.%b 8
Tetraglyme		9.1 wt.%b 4	insol.4
DMF		18.0 wt.% 4	15.0 wt.%4									sol.14
Dimethylacetamide		14.0 wt.% 9
DMSO		5.8 wt.%b 9								1.87 wt.%13
Acetonitrile	sol.5	2.0 wt.%9	insol.1							0.4 wt.%b 13	sol.14	sol.14
		< 1 wt.%10
1,4-Dioxane	0.3 wt.%8	insol.10	insol.6				0.1 wt.%b 8			insol.13
2-Ethoxyethanol		< 1 wt.%10								insol.13
1,2-Diethoxyethane		< 1 wt.%10
Ethyl acetate		< 1 wt.%10								insol.4
Diethyl ether	1.4 M2	insol.8	insol.1	insol.b 8	insol.b 8	sol. (20.8 wt.%)b 5,6,8	insol. (0.045M)b 8	insol.6,8		insol.13	insol.14	insol.14									sol.17
	4.5 wt.%8
	3 g/100 g (20°C)4
	28 g/100 g (39°C)4
Dimethyl ether																					sol.17
Trimethyl borate		< 1 wt.%10
Chloroform										insol.13	sol.14	reac.14
Carbon disulfide
o-Bismethoxybenzene	sol.5
Benzene										insol.4	sol.5,14	insol.14
Dimethylsulfide						60 mmol/L 6							50 mmol/L6	60 mmol/L6			< 20 mmol/L6		sol.6	sol.16
Dichloromethane											0.31 g/mlb 15	sol. (or 0.9 M)b 15
											1.2 Mb 15	0.13 g/mlb 15
Dichloroethane
Hydrazine	15.6 wt.%(RT)4											sol. (30 wt.% at 20°C)14
Hexane											insol.14
Acetone						reac.				insol.4
Cyclohexane												insol.14
RNH2		sol.6
Carbon tetrachloride												insol.14
Piperidine						sol.12				insol.13
Benzylamine						sol.12
Notes: a alkaline, * the stability of BH4- in water is enhanced in alkaline solutions (addition of acetic acid leads to strong reaction), b 25°C

## Sheet: closo-B10H10(2-)
Solvent	Compound
	Li2B10H10·2.6H2O	Na2B10H10·0.7H2O	K2B10H10·0.6H2O	Ag2B10H10	Cs2B10H10	Tl2B10H10	HgB10H10	(R4N)2B10H10	(R3NH)2B10H10	R(R4P)2B10H10	(R3S)2B10H10	Ni(NH3)6B10H10	[NH(Et)3]2B10H10	CaB10H10	BaB10H10	Li2B10H10	[Ni(DMF)6][B10H10]	[Ni(DMSO)6][B10H10]	Na2B10H10	K2B10H10	(TEA)2B10H10
Water	18.8 g B/100 ml (4°C)18	13.9 g B/100 ml (4°C)18	6.4 g B/100 ml (4°C)18	insol.19,20	insol.19	insol.19	insol.19	insol.19	insol.19	insol.19	insol.19	insol.19	vs.19	sol.19	sol.19	sol.21	reac.22	reac.22	sol.18
	32.3 g B/100 ml (22°C)18	21.1 g B/100 ml (22°C)18	8.4 g B/100 ml (22°C)18
	54.3 g B/100 ml (40°C)18	37.2 g B/100 ml (40°C)18	16.5 g B/100 ml (40°C)18
	87.1 g B/100 ml (60°C)18	58.5 g B/100 ml (60°C)18	26.1 g B/100 ml (60°C)18
Methanol																sol.21
Ethanol																sol.21			sol.23
THF																insol.21
2-propanol																sol.21			sol.24
DMF																sol.21
DMSO																sol.21
Acetonitrile																sol.21	reac.22	reac.22		sol.26	sol.14
Diethyl ether																			sol.25
Dichloromethane																insol.21
Acetone																sol.21
2-Butanol																sol.21
2-Butanone																reac.21
Toluene																insol.21
Cyclohexane																insol.21

## Sheet: closo-B12H12(2-)
Solvent	Compound
	Na2B12H12	Na2B12H12·1.5H2O	Li2B12H12	Li2B12H12·3H2O	K2B12H12	K2B12H12·1.3H2O	[(CH3)3NH]2B12H12	Ag2B12H12	Cs2B12H12	Tl2B12H12	HgB12H12	(R4N)2B12H12	(R3NH)2B12H12	R(R4P)2B12H12	(R3S)2B12H12	Ni(NH3)6B12H12	[NH(Et)3]2B12H12	CaB12H12	BaB12H12	(Me4N)2B12H12
Water	sol.18,24	13.1 g B/100 ml (4°C)18	sol.18,21	16.8 g B/100 ml (4°C)18	sol.18	6.6 g B/100 ml (4°C)18	insol.31	insol.19,20	insol.19	insol.19	insol.19	insol.19	insol.19	insol.19	insol.19	insol.19	insol.19	sol.19	sol.19	sol.b 33
		21.4 g B/100 ml (22°C)18		27.9 g B/100 ml (22°C)18		9.2 g B/100 ml (22°C)18
		32.0 g B/100 ml (40°C)18		41.6 g B/100 ml (40°C)18		20.0 g B/100 ml (40°C)18
		47.3 g B/100 ml (60°C)18		67.0 g B/100 ml (60°C)18		32.2 g B/100 ml (60°C)18
Methanol			sol.21
Ethanol	sol.27		sol.21
THF	sol.28		insol.21
2-Propanol	sol.24		sol.21
Diglyme					sl.31
DMF			sol.21
DMSO			sol.21
Acetonitrile			sol.21		sol. (0.035 M)a 32
Dichloroethane			insol.21
Acetone			sol. (0.15 M)21,29
Propylene carbonate			insol.30
EC-DMC			insol.30
BMIM-TFSI			insol.30
2-Butanol			sol.21
2-Butanone			reac.21
Toluene			insol.21
Cyclohexane			insol.21
Notes: a in 0.3% water containing acetonitrile, b boiling

## Sheet: nido-B11H14(-)
Solvent	Compound
	RbB11H14	CsB11H14	[(CH3)4N]B11H14	[(CH3)3S]B11H14	[(C2H5)3NH]B11H14	[(CH3)3NH]B11H14	Ca(B11H14)2 ⋅ 4Dg	Nd(B11H14)3 · 4Dg	NaB11H14	LiB11H14	KB11H14	TEAB11H14	NaB11H14.ndioxane	B11H14-
Water	insol.34	insol.34	insol.34	insol.34	insol.34	insol.34	sol.38	sol.39
THF						sol.35	sol.38	sol.39		sol.35
2-Propanol								sl.39
Diglyme							sol.38	sol.39	sol.36				insol.28	sol.31
DMSO									sol.b 36	sol.b 36	sol.b 36
Acetonitrile						sol.a 36,37
Diethyl ether												insol.40
Hexane							insol.38	insol.39
Acetone												10 g/ 100 mL40
Pentane							insol.38	insol.39
Notes: a in deuterated acetonitrile (CD3CN), b in DMSO-d6

## Sheet: others
Solvent	Compound
	[(hex)4N]2B12Cl12	Na2B12H6Br6	Li2B12(OH)12	Na2B12(OH)12	K2B12(OH)12	Rb2B12(OH)12	Cs2B12(OH)12	(NH4)2B12(OH)12	(H3O)2B12(OH)12	B9H14-	1,6-(CH3)2SB10H8NH3	2,4-B10H8(NH3)2	B12H10[N(CH3)3]2	1,12-B12H10(NH3)2	Cu2(CH3CN)4[B10H10]	{(p-Cymene)Ru[S2C2(B10H10)]}- Mo(CO)2{(CO)3Ru[S2C2(B10H10)]}	(COD)2Rh2(l2-S2C2B10H10)	(COD)2Rh2(l2-Se2C2B10H10)	[Ni(DMF)6][B10H10]	[Ni(DMSO)6][B10H10]	[(CH3)4N]2B20H18	H2B[P(CH3)3]2B12H11P(CH3)3	[H2B[P(CH3)3]2]2B12H12	B12H10[S(CH3)2]2	[Zn(NH3)4]B11H13	[(CH3)3S]2B11H13	[(CH3)4N]2B11H13	K2B9H13	Na2B9H13	B11H11PCH3	Na2B5H9	K2B5H9	Rb2B5H9	Cs2B5H9	NaH	Na2B11H13	K2B11H11	[(CH3)3PhNH4]2B11H11	(9-BBN)B10H13	KHF2	1,12-B12H10(NH3)2	KB12H11(NH3)	1,2-B12H10(NH3)2	1,7-B12H10(NH3)2	NH3BH3	NaB3H8	Li2B10Cl10	Li2B12Cl12	B5H9
Water	insol.20		3 × 10-3 Ma 41	7.2 × 10-4 Ma 41	2.8 × 10-3 Ma 41	5.4 × 10-3 Ma 41	7.8 × 10-3 Ma 41	8.4 × 10-4 Ma 41	1.9 × 10-4 Ma 41		insol.42	insol.42	insol.42	insol.42					reac.22	reac.22		insol.28	sol.28	insol.28	insol.34	insol.34	insol.34									sol.36	sol.50				insol.42, 52	vs.52	vs.52		35 g/100 g H2O53	> 74 g/100 g H2O53	sol.55	sol.55	reac.56
Methanol	sol.20
Ethanol
THF		sol.20															sol.45	sol.45										insol.47	sol.47		sl.47	insol.47	insol.47	insol.47	insol.49											sol.54	insol.55	insol.55	sol.57
																																sol.48	sol.48	sol.48
Ammonia																												sol.47	sol.47
2-Propanol
t-Butanol
2-Ethylhexanol
Tetrahydrofurfuryl alcohol
Diglyme										sol.31																																					insol.55	insol.55
DMSO																																						sol.b 50
Acetonitrile															sl.43				reac.22	reac.22	sol.46									sol.47										insol.52		sol.52				sol.54	sol.55	sol.55
1,4-Dioxane	sl.20																																			sl.49
Ethyl acetate																																									sol.52	insol.52	insol.52	sol.52			sol.55	sol.55
Diethyl ether																																				sl.49										sol.54			sol.58
Chloroform																														sol.47
Carbon disulfide	sl.20
o-Bismethoxybenzene																																							sol.51
Benzene	insol.20
Dichloromethane																sol.44														sol.47									sol.51							sl.54
Hexane	insol.20															sl.44	sl.45	sl.45												sl.47									sol.51
Acetone	sol.20																																														sol.55	sol.55
Propylene carbonate																																															sol.55	sol.55
Methylene chloride	sol.20
2-Butanol
Toluene																sol.44														sol.47
Cyclohexane
Pentane																														sl.47
DME/1,3-dioxolane mixture																																															sol.55	sol.55
DME																												insol.47	sol.47		sl.47	insol.47	insol.47	insol.47													insol.55	insol.55	1.39 g/10 mL56
																																sol.48	sol.48	sol.48
1,3- dioxolane																																															insol.55	insol.55
Carbon tetrachloride
Alcohols
Paraffinic hydrocarbons
Concentrated phosphoric acid
Methyl iodide
1-Butanol
n-Propyl bromide
Ethyl silicate
Butyraldehyde
Acetic anhydride
Acetic acid
Triethyl borate
Caprylic acid
Notes: a 25°C, b in DMSO-d6, c acidic, d hot, e shock sensitive, f warm
[truncated: 50 more columns]

## Sheet: Dielectric constants
Solvents	Dielectric constants
Water	78.5
Methanol	32.6
Ethanol	24.6
THF	7.5
Ammonia	16.6
Methylamine	16.7
Ethylamine	8.7
Diethylamine	3.7
Triethylamine	2.4
Trimethylamine	2.9
TMEDA	2
Ethylenediamine	16.1
n-Propyl amine	5.1
Isopropyl amine	5.6
t-Butyl amine	4.3
n-Butyl amine	4.7
Cyclohexylamine	4.7
Morpholine	7.3
Aniline	7.1
Pyridine	12.3
Ethanolamine	31.9
2-Propanol	19.9
t-Butanol	12.5
2-Ethylhexanol	7.7
Tetrahydrofurfuryl alcohol	2.1
Monoglyme	7.3
Diglyme	7.2
Triglyme	7.5
Tetraglyme	12
DMF	38.2
Dimethylacetamide	37.8
DMSO	47
Acetonitrile	36.6
1,4-Dioxane	2.2
2-Ethoxyethanol	29.6
1,2-Diethoxyethane	3.9
Ethyl acetate	6
Diethyl ether	4.3
Dimethyl ether	5
Trimethyl borate	2.3
Chloroform	4.8
Carbon disulfide	2.6
o-Bismethoxybenzene	4.3
Benzene	2.3
Dimethylsulfide	6.3
Dichloromethane	9.1
Dichloroethane	10.4
Hydrazine	51.7
Hexane	1.9
Acetone	21
Glycerol	46.5
Propylene carbonate	64.4
EC-DMC	31.4
BMIM-TFSI	14
Methylene chloride	8.9
2-Butanol	17.3
2-Butanone	18.6
Toluene	2.4
Cyclohexane	2
Pentane	1.8
Thionyl chloride	9.3
DME/1,3-dioxolane mixture	7.3
DME	7.2
1,3- dioxolane	19
RNH2
Carbon tetrachloride	2.2
Alcohols
Paraffinic hydrocarbons
Concentrated phosphoric acid
Methyl iodide	7.1
Common organic solvents
Anisole	4.3
1-Butanol	17.8
n-Propyl bromide	7.2
Ethyl silicate	2.5
Butyraldehyde	13.4
Acetic anhydride	22
Acetic acid	6.2
Triethyl borate	2.2
Caprylic acid	2.5
n-Heptane	1.9
Piperidine	5.9
Benzylamine	4.6

## Sheet: Abbreviation
Abbrivation	Meaning
sol.	soluble
insol.	insoluble
vs.	very soluble
sl.	slightly soluble
reac.	reacts with
THF	tetrahydrofuran
TMEDA	tetramethylethylenediamine
DMF	dimethylformamide
DMSO	dimethyl sulfoxide
EC-DMC	ethylene carbonate : dimethyl carbonate (1 : 1 vol.%)
BMIM-TFSI	1-butyl-3-methylimidazolium bis(trifluoromethylsulfonyl)imide
DME	1,2-dimethoxyethane
TEA	tetraethylamine
TBA	tetrabuthylamine
TMA	tetramethylamine
COD	cycloocta-1,5-diene (C8H12)
9-BBN	9-bora[3.3.1]bicyclononane (BC8H14)
hex	hexane

## Sheet: References
References
1. D. R. Lide, CRC Handbook of Chemistry and Physics, 88th Edition, Taylor & Francis, 2007.
2. H. C. Brown, Y. M. Choi and S. Narasimhan, Inorg. Chem., 1982, 21, 3657.
3. B. D. James and M. G. H. Wallbridge, in Progress in Inorganic Chemistry, 1970, DOI: https://doi.org/10.1002/9780470166123.ch3, pp. 99.
4. R. M. Adams, Boron, metallo-boron compounds and boranes, Interscience Publishers New York, 1964.
5. H. Noth and B. Wrackmeyer, Nuclear Magnetic Resonance Spectroscopy of Boron Compounds, Springer Science & Business Media, 1978.
6. B. Richter, J. B. Grinderslev, K. T. Møller, M. Paskevicius and T. R. Jensen, Inorg. Chem., 2018, 57, 10768.
7. C. R. Cloutier, University of British Columbia, 2006.
8. H. Hagemann and R. Černý, Dalton Trans., 2010, 39, 6006.
9. Yamamoto J. Sodium borohydride digest. Rohm, H, Ed. 2003.
10. H. Schlesinger, H. C. Brown and A. Finholt, J. Am. Chem. Soc., 1953, 75, 205.
11. K. Chłopek, C. Frommen, A. Léon, O. Zabara and M. Fichtner, J. Mater. Chem., 2007, 17, 3496.
12. M. Bremer, H. Nöth and M. Warchhold, Eur. J. Inorg. Chem., 2003, 2003, 111.
13. M. D. Banus, R. W. Bragdon and T. R. Gibb Jr, J. Am. Chem. Soc., 1952, 74, 2346.
14. L.V. Titov and L.A. Gavrilova, Russ. J. Inorg. Chem. 1970, 15, 1509
15. D. J. Raber, W. C. Guida and D. C. Shoenberger, Tetrahedron Lett., 1981, 22, 5107.
16. T. D. Humphries, M. B. Ley, C. Frommen, K. T. Munroe, T. R. Jensen and B. C. Hauback, J. Mater. Chem. A, 2015, 3, 691.
17. R. R. Rietz, A. Zalkin, D. H. Templeton, N. M. Edelstein and L. K. Templeton, Inorg. Chem., 1978, 17, 653.
18. A. Blake, Master of Science Electronic theses & dissertation, Pittsburg State University 2015.
19. E. Muetterties, J. Balthis, Y. Chia, W. Knoth and H. Miller, Inorg. Chem., 1964, 3, 444.
20. W. H. Knoth, H. Miller, J. C. Sauer, J. Balthis, Y. Chia and E. Muetterties, Inorg. Chem., 1964, 3, 159.
21. A. Garcia, G. Müller, R. Černý, D. Rentsch, R. Asakura, C. Battaglia and A. Remhof, J. Mater. Chem. A, 2023, 11, 18996.
22. V. V. Avdeeva, I. N. Polyakova, L. V. Goeva, G. A. Buzanov, E. A. Malinina and N. T. Kuznetsov, Inorg. Chim. Acta, 2016, 451, 129.
23. L. I. Zakharkin, V. V. Guseva and P. V. Petrovskii, Russ. J. Gen. Chem., 2001, 71, 1017.
24. A. Gigante, L. Duchêne, R. Moury, M. Pupier, A. Remhof and H. Hagemann, ChemSusChem, 2019, 12, 4832.
25. R. Moury, A. Gigante and H. Hagemann, Int. J. Hydrogen Energy, 2017, 42, 22417.
26. X. Zheng, Y. Yang, F. Zhao, F. Fang and Y. Guo, Chem. Commun., 2017, 53, 11083.
27. M.-C. Bay, R. Grissa, K. V. Egorov, R. Asakura and C. Battaglia, Mater. Futures, 2022, 1, 031001.
28. H. Miller, N. Miller and E. Muetterties, Inorg. Chem., 1964, 3, 1456.
29. V. Mustyatsa, N. Votinova, I. Dudenkov, K. Solntsev and N. Kuznetsov, Russ. J. Coord. Chem., 1998, 24, 847.
30. M. M. Green, California State University, Northridge, 2023.
31. J. Wang, T. Steenhaut, H.-W. Li and Y. Filinchuk, Inorg. Chem., 2023, 62, 2153.
32. D. V. Peryshkov, A. A. Popov and S. H. Strauss, J. Am. Chem. Soc., 2009, 131, 18393.
33. X. Mu, J. C. Axtell, N. A. Bernier, K. O. Kirlikovali, D. Jung, A. Umanzor, K. Qian, X. Chen, K. L. Bay and M. Kirollos, Chem, 2019, 5, 2461.
34. V. Aftandilian, H. Miller, G. Parshall and E. Muetterties, Inorg. Chem., 1962, 1, 734.
35. S. Payandeh, D. Rentsch, Z. Łodziana, R. Asakura, L. Bigler, R. Černý, C. Battaglia and A. Remhof, Adv. Funct. Mater., 2021, 31, 2010046.
36. D. H. P. Souza, A. M. D'Angelo, T. D. Humphries, C. E. Buckley and M. Paskevicius, Dalton Trans., 2022, 51, 13848.
37. G. B. Dunks, K. Barker, E. Hedaya, C. Hefner and P. Remec, Inorg. Chem., 1981, 20, 1692.
38. L. V. Titov and P. V. Petrovskii, Russ. J. Inorg. Chem., 2011, 56, 1032.
39. L. V. Titov, L. A. Gavrilova and P. V. Petrovskii, Russ. J. Inorg. Chem., 2008, 53, 565.
40. G. B. Dunks and K. P. Ordonez, Inorg. Chem., 1978, 17, 1514.
41. T. Peymann, C. B. Knobler, S. I. Khan and M. F. Hawthorne, J. Am. Chem. Soc., 2001, 123, 2182.
42. W. Hertler and M. Raasch, J. Am. Chem. Soc., 1964, 86, 3661.
43. V. V. Avdeeva, E. A. Malinina, A. V. Churakov, I. N. Polyakova and N. T. Kuznetsov, Polyhedron, 2019, 169, 144.
44. S. Liu, X. Wang and G.-X. Jin, J. Organomet. Chem., 2006, 691, 261.
45. S. Cai, X. Hou, L.-H. Weng and G.-X. Jin, J. Organomet. Chem., 2005, 690, 910.
46. B. Chamberland and E. Muetterties, Inorg. Chem., 1964, 3, 1450.
47. S. G. Shore and O. S. U. R. F. COLUMBUS, Studies on Syntheses and Derivatives of Boron Hydride Systems, 1988.
48. H. Beall and D. F. Gaines, Inorg. Chim. Acta, 1999, 289, 1.
49. A. Berger, C. E. Buckley and M. Paskevicius, Inorg. Chem., 2021, 60, 14744.
50. O. Volkov, W. Dirk, U. Englert and P. Paetzold, Z. anorg. allg Chem., 1999, 625, 1193.
51. A. N. Bridges, J. Liu, R. G. Kultyshev, D. F. Gaines and S. G. Shore, Inorg. Chem., 1998, 37, 3276.
52. E. V. Bukovsky, Colorado State University, 2015.
53. S. Pylypko, S. Ould-Amara, A. Zadick, E. Petit, M. Chatenet, M. Cretin and U. B. Demirci, Appl. Catal., B, 2018, 222, 1.
54. A. C. Dunbar, J. A. Macor and G. S. Girolami, Inorg. Chem., 2014, 53, 822.
55. J. W. Johnson and J. F. Brody, J. Electrochem. Soc., 1982, 129, 2213.
56. N. S. Hosmane, J. R. Wermer, Z. Hong, T. D. Getman and S. G. Shore, Inorg. Chem., 1987, 26, 3638.
57. S. H. Lawrence, J. R. Wermer, S. K. Boocock, M. A. Banks, P. C. Keller and S. G. Shore, Inorg. Chem., 1986, 25, 367.
58. D. F. Gaines and T. V. Iorns, J. Am. Chem. Soc., 1967, 89, 3375.
59. A. Y. Bykov, A. P. Zhdanov, K. Y. Zhizhin and N. T. Kuznetsov, Russ. J. Inorg. Chem., 2016, 61, 1629.
60. J. Forstner, T. Haas and E. Muetterties, Inorg. Chem., 1964, 3, 155.
61. N. Kuznetsov, L. Kulikova and S. Zhukov, Zh. Neorg. Khim.;(USSR), 1976, 21, 96.
62. W. Preetz and G. Peters, Eur. J. Inorg. Chem., 1999, 1999, 1831.
63. F. Klanberg, D. R. Eaton, L. J. Guggenberger and E. L. Muetterties, Inorg. Chem., 1967, 6, 1271.
64. E. Muetterties, R. Wiersema and M. Hawthorne, J. Am. Chem. Soc., 1973, 95, 7520.
65. F. Klanberg and E. Muetterties, Inorg. Chem., 1966, 5, 1955.
66. M. J. Bayer and M. F. Hawthorne, Inorg. Chem., 2004, 43, 2018.
67. W. R. Hertler, F. Klanberg and E. L. Muetterties, Inorg. Chem., 1967, 6, 1696.
68. N. Miller, J. Forstner and E. Muetterties, Inorg. Chem., 1964, 3, 1690.
69. W. H. Knoth and E. L. Muetterties, J. Inorg. Nucl. Chem., 1961, 20, 66.
70. H. Miller, W. Hertler, E. Muetterties, W. Knoth and N. Miller, Inorg. Chem., 1965, 4, 1216.
71. W. Knoth, J. Am. Chem. Soc., 1966, 88, 935.
72. W. H. Knoth, J. C. Sauer, J. H. Balthis, H. C. Miller and E. L. Muetterties, J. Am. Chem. Soc., 1967, 89, 4842.
73. M. A. Nelson and G. Kodama, Inorg. Chem., 1981, 20, 3579.
74. V. Brice, H. Johnson, D. Denton and S. G. Shore, Inorg. Chem., 1972, 11, 1135.
75. J. M. Makhlouf, W. V. Hough and G. T. Hefferan, Inorg. Chem., 1967, 6, 1196.
76. X. Chen, X.-R. Liu, X. Wang, X.-M. Chen, Y. Jing and D. Wei, Dalton Trans., 2021, 50, 13676.
